# Supplementary material for: Effects of lixisenatide on elevated liver transaminases: systematic review with individual patient data meta-analysis of randomised controlled trials on patients with type 2 diabetes
Source: PubMed Central journal article supplement — BMJ Open. 2014 Dec 19;4(12):e005325. doi: 10.1136/bmjopen-2014-005325 (PMC4275683; doi:10.1136/bmjopen-2014-005325), 2014-12-19
Supplement: bmjopen-2014-005325.draft_revisions.pdf [file bmjopen-2014-005325.draft_revisions.pdf]

# BMJ Open

## Effects of the glucagon-like peptide-1 receptor agonist lixisenatide on non-alcoholic fatty liver disease: systematic review with individual patient data meta-analysis of randomised controlled trials

|                                 |                                                                                                                                                                                                                                                                                             |
|---------------------------------|---------------------------------------------------------------------------------------------------------------------------------------------------------------------------------------------------------------------------------------------------------------------------------------------|
| Journal:                        | <i>BMJ Open</i>                                                                                                                                                                                                                                                                             |
| Manuscript ID:                  | bmjopen-2014-005325                                                                                                                                                                                                                                                                         |
| Article Type:                   | Research                                                                                                                                                                                                                                                                                    |
| Date Submitted by the Author:   | 23-Mar-2014                                                                                                                                                                                                                                                                                 |
| Complete List of Authors:       | Gluud, Lise; Department of Gastroenterology, Knop, Filip; Gentofte Hospital, University of Copenhagen, Diabetes Research Division, Department of Internal Medicine Vilsbøll, Tina; Gentofte Hospital, University of Copenhagen, Diabetes Research Division, Department of Internal Medicine |
| <b>Primary Subject Heading</b>: | Diabetes and endocrinology                                                                                                                                                                                                                                                                  |
| Secondary Subject Heading:      | Gastroenterology and hepatology                                                                                                                                                                                                                                                             |
| Keywords:                       | General diabetes < DIABETES & ENDOCRINOLOGY, Adult gastroenterology < GASTROENTEROLOGY, Hepatobiliary disease < GASTROENTEROLOGY, Hepatology < INTERNAL MEDICINE                                                                                                                            |
|                                 |                                                                                                                                                                                                                                                                                             |

SCHOLARONE™  
Manuscripts

1  
2  
3  
4 **Effects of the glucagon-like peptide-1 receptor agonist lixisenatide on non-alcoholic**  
5 **fatty liver disease: systematic review with individual patient data meta-analysis of**  
6 **randomised controlled trials**  
7  
8  
9

10  
11  
12 Lise L. Gluud<sup>1,2</sup>, Filip K. Knop<sup>1</sup>, Tina Vilsbøll<sup>1</sup>  
13  
14

15  
16  
17 <sup>1</sup>Diabetes Research Center, Department of Medicine, Gentofte Hospital, University of  
18 Copenhagen, Denmark  
19

20  
21 <sup>2</sup>Department of Gastroenterology, Hvidovre Hospital, University of Copenhagen, Denmark  
22  
23

24  
25  
26 *L.L. Gluud, Consultant, DMSc*  
27

28 *F.K. Knop, Associate Professor, Specialist Registrar, PhD*  
29

30 *T. Vilsbøll, Professor, Consultant, DMSc*  
31  
32

33 Running Head: Lixisenatide for type 2 diabetes and elevated liver blood tests  
34

35 Correspondence to: Gluud, liselottegluud@yahoo.dk  
36

37 Department of Gastroenterology, Copenhagen University Hospital Hvidovre, Kettagaards  
38 Alle, DK-2650 Hvidovre, Denmark.  
39  
40

41 **Key words**  
42

43 Non-alcoholic fatty liver disease, non-alcoholic steatohepatitis, meta-analysis, insulin  
44 resistance, type 2 diabetes, alanine amino transferase.  
45  
46  
47

48 **Word count** Abstract 237; Text 20921  
49  
50  
51  
52  
53  
54  
55  
56  
57  
58  
59  
60

**What we already know**

Patients with type 2 diabetes (especially those who are overweight) have a high risk of developing non-alcoholic fatty liver disease (NAFLD). Alanine aminotransferase (ALT) is associated with NAFLD, especially in the early stages. Interventions that improve glycaemic control may have beneficial effects on NAFLD in type 2 diabetes. The glucagon-like peptide-1 receptor agonist lixisenatide improves glycaemic control in type 2 diabetes.

**What this study adds**

Lixisenatide increases the proportion of patients with normalisation of ALT compared with placebo or active comparators.

The effect of lixisenatide on normalisation of ALT was confirmed in subgroup analyses on patients who were obese or overweight, but not for patients with a normal weight.

No beneficial or detrimental effects of lixisenatide on aspartate aminotransferase, alkaline phosphatase or bilirubin were identified.

## Abstract

**Objective** To evaluate the effects of the glucagon-like peptide-1 receptor agonist lixisenatide on elevated liver blood tests in patients with type 2 diabetes.

**Design** Systematic review.

**Data sources** Electronic and manual searches were combined.

**Study selection** Randomised controlled trials (RCTs) on lixisenatide versus placebo or active comparators for type 2 diabetes were included.

**Participants** Individual patient data were retrieved to calculate outcomes for patients with elevated liver blood tests.

**Main outcome measures** Normalisation of alanine aminotransferase (ALT) and aspartate aminotransferase.

**Data Synthesis** The results of included trials were combined in meta-analyses. Sequential, subgroup and regression analyses were performed to evaluate heterogeneity and bias.

**Results** Included RCTs compared lixisenatide versus placebo (n=12) or the active comparators (N=3) liraglutide, exenatide and sitagliptin. The mean treatment duration was 29 weeks. Lixisenatide increased the proportion of patients with normalisation of ALT (risk difference 0.07, 95% confidence interval 0.01 to 0.14; number needed to treat 14 patients). The effect was not confirmed in sequential analysis. No effects of lixisenatide were identified on aspartate aminotransferase, alkaline phosphatase or bilirubin. No evidence of

1  
2  
3  
4 bias was identified. Mixed effect multilevel meta-regression analyses suggested that the  
5  
6 benefit of lixisenatide was limited to patients who were overweight or obese.  
7  
8

9 **Conclusion** This review suggests that lixisenatide increases the proportion of obese or  
10  
11 overweight patients with type 2 diabetes who achieve normalisation of ALT. Additional  
12  
13 research is needed to determine if the findings translate to clinical outcome measures.  
14  
15  
16  
17  
18  
19  
20  
21  
22  
23  
24  
25  
26  
27  
28  
29  
30  
31  
32  
33  
34  
35  
36  
37  
38  
39  
40  
41  
42  
43  
44  
45  
46  
47  
48  
49  
50  
51  
52  
53  
54  
55  
56  
57  
58  
59  
60

## Strengths and limitations of this study

- This systematic review of randomised controlled trials evaluates if lixisenatide has a beneficial effect of liver blood tests associated with non-alcoholic fatty liver disease (NAFLD) and non-alcoholic steatosis (NASH).
- Based on analyses of individual patient data, lixisenatide increases the proportion of patients with normalisation of alanine aminotransferase (ALT) compared with placebo or active comparators. In subgroup analyses, the effect was verified for patients who were obese or overweight, but not for patients with a normal weight.
- The analyses include data from published and unpublished trials with intention to treat analyses of all patients included irrespective of compliance or follow up. The bias control was classed as adequate in all trials based on four or five of the five components included in the Cochrane bias assessment tool.
- Although ALT is the most sensitive biochemical marker of NAFLD and NASH, important effects may be overlooked because patients with severe liver disease were excluded from the trials.
- The available data did not allow for assessment of clinical outcome measures such as development of cirrhosis or hepatocellular carcinoma.

## Introduction

The incidence of non-alcoholic fatty liver disease (NAFLD) is increasing and the costs to are considerable.[1-3] About ten per cent of patients with NAFLD develop non-alcoholic steato-hepatitis (NASH), which may progress to cirrhosis and hepatocellular carcinoma. Obesity and decreased insulin sensitivity increase the risk of these complications. The risk of NAFLD and NASH is associated with type 2 diabetes and obesity. NAFLD is generally an asymptomatic disease. Liver blood tests are linked with metabolic risk factors and are independent predictors of NAFLD although the sensitivity is low.[4] A systematic review on observational studies found that routinely available biochemical markers may be used in the assessment of NAFLD.[5] Elevation of alanine aminotransferase (ALT) is more common than aspartate aminotransferase (AST).[6] The gold standard for the assessment of patients with NAFLD is to perform a liver biopsy but the procedure is associated with risks and potential sampling error. Biopsy-related complications including bleeding still occur in ultrasonically-guided techniques.[7 8]

A systematic review from 2007 found three randomised controlled trials (RCTs) on drugs that aim to improve insulin resistance in patients with NAFLD or NASH.[9] Based on a meta-analysis including two of these trials, treatment with metformin increased the proportion of patients with normalisation of ALT compared with diet alone or vitamin E. A subsequent health technology assessment on insulin sensitizers for NAFLD[10] included RTCs on metformin, rosiglitazone and pioglitazone. Pioglitazone improved liver histology. The effect of metformin on histology was less convincing, but both metformin and pioglitazone reduced ALT. A systematic review on the glucagon-like peptide-1 receptor agonists (GLP-1RAs) liraglutide and exenatide for patients with diabetes found beneficial

1  
2  
3  
4 effects on body weight, ALT and AST.[11] Unfortunately, subgroup analyses on patients  
5  
6 with increased liver blood tests were not available.  
7  
8  
9

10 Patients with type 2 diabetes and elevated transaminases have a considerable risk of  
11  
12 NAFLD and subsequently NASH. The risk of developing NASH and the severity of the  
13  
14 disease is closely linked with impaired insulin sensitivity and overweight. Lixisenatide is a  
15  
16 GLP-1RA that improves glycaemic control and reduces body weight in patients with type 2  
17  
18 diabetes.[12 13] These effects suggest a potential benefit in patients with type 2 diabetes  
19  
20 and NAFLD. At present, there are no RCTs on lixisenatide or other GLP1RAs for patients  
21  
22 with NAFLD. We therefore conducted a systematic review with individual patient meta-  
23  
24 analyses on patients with type 2 diabetes and elevated liver blood tests randomised to  
25  
26 lixisenatide, placebo, no intervention or active controls.  
27  
28  
29  
30  
31  
32

## 33 **Methods**

34  
35  
36  
37 This review is based on a registered protocol (CRD42013005779). The review methods  
38  
39 follow the recommendations described in the Cochrane Handbook for Reviews on  
40  
41 Interventions ([www.cochrane.org](http://www.cochrane.org)). RCTs were included irrespective of blinding, language  
42  
43 or publication status. Adult patients with elevated liver blood tests were included  
44  
45 irrespective of gender or body weight. The intervention comparisons included lixisenatide  
46  
47 versus placebo, no intervention or other active comparators.  
48  
49  
50  
51  
52  
53

54 Based on previous evidence,[6] the primary outcome measures were normalisation of ALT  
55  
56 and AST. Secondary outcome measures included normalisation of alkaline phosphatase  
57  
58  
59  
60



1  
2  
3  
4 and bilirubin as well as a normalisation of the composite outcome measure combining all  
5  
6 liver blood tests. The pharmaceutical company producing lixisenatide (Sanofi-Aventis)  
7  
8 provided data and additional information on the design of included trials. All outcomes  
9  
10 were recalculated based on individual patient data.  
11  
12

13  
14  
15  
16  
17 All authors participated in the identification and selection of trials. Excluded trials were  
18  
19 listed with the reason for exclusion. Eligible trials were identified through electronic and  
20  
21 manual searches. Electronic searches were performed in MEDLINE, Cochrane Library,  
22  
23 Embase and Web of science. The Cochrane Library was searched using the strategy:  
24  
25 lixisenatide ti, ab, kw (with automated word variations included). Additional manual  
26  
27 searches were performed in reference lists of relevant papers, correspondence with  
28  
29 experts, the pharmaceutical company producing lixisenatide and the World Health  
30  
31 Organisation Trial Search Database (<http://apps.who.int/trialsearch/>).  
32  
33  
34  
35  
36  
37

38 The bias risk assessment followed the recommendations described in the Cochrane  
39  
40 Handbook for Reviews of Interventions and included the domains selection bias (random  
41  
42 sequence generation, allocation concealment), performance bias (blinding of participants  
43  
44 and personnel, blinding of outcome assessment), attrition bias (incomplete outcome data),  
45  
46 reporting bias (selective reporting), and other sources of bias.  
47  
48  
49  
50  
51  
52  
53  
54  
55  
56  
57  
58  
59  
60

## Statistical Analysis

The analyses were performed in Stata version 13 (STATA Corp, Texas, USA). Random effects meta-analyses were performed due to an expected between study heterogeneity. The results were expressed as risk differences with 95% confidence intervals and  $I^2$  as a measure of heterogeneity and with the number needed to treat for statistically significant outcome measures. We defined  $I^2$  values below 30% as unimportant, 30-50% as moderate heterogeneity, 50-75% as substantial heterogeneity and >75% as considerable heterogeneity. All patients were included in the analysis irrespective of compliance or follow-up and with imputation of outcomes for patients with missing outcome data (intention to treat).

Mixed effect multilevel meta-regression and subgroup analyses were performed to evaluate heterogeneity. The meta-regression analysis evaluated the influence of the metabolic regulation ( $HbA_{1c} \leq 8.5\%$  (69 mmol/mol)), duration of diabetes ( $\geq 5$  years), and body mass index (BMI) (normal weight  $\leq 25$  kg/m<sup>2</sup>, overweight  $>25$  kg/m<sup>2</sup> or obese  $>30$  kg/m<sup>2</sup>). Post-hoc analyses were performed to evaluate the effect of the change in bodyweight and ALT. The subgroup analyses evaluated the influence of publication status (full paper articles compared with abstracts and unpublished trials), control groups and collateral interventions. Since all trials had a low risk of bias, we did not perform subgroup analyses on bias control. Publication bias and other small study effects were estimated in regression analyses (Harbord's test) and funnel plots. We performed sequential analyses to evaluate the robustness of results from meta-analyses with a statistically significant result. The analysis was performed with alpha set to 5%, power to 80%, model-based

1  
2  
3  
4 diversity correction and the relative risk reduction and control group incidence rate  
5  
6 determined in the meta-analysis.  
7  
8  
9

## 10 11 12 **Results** 13

14  
15 The initial searches identified 531 potentially eligible records (figure 1). After reading the  
16 titles and abstracts, duplicates and records that clearly did not describe RCTs on  
17 lixisenatide were excluded. One ongoing trial was excluded because data were not yet  
18 available. The remaining records referred to 15 multicentre RCTs that were included in the  
19 qualitative and quantitative analyses (table 1). Eleven trials were published as full paper  
20 articles,[14-24] three were published as abstracts[25-27] and one was unpublished.  
21  
22  
23  
24  
25  
26  
27  
28  
29  
30  
31

32 None of the included trials found statistically significant differences between patient  
33 characteristics in the lixisenatide and control groups. The proportion of men was 50% and  
34 the mean age in the lixisenatide and control group ranged from 43 to 61 years (table 2).  
35 For the lixisenatide group, mean BMI ranged from 25.1 to 36.8 kg/m<sup>2</sup> and the mean HbA<sub>1c</sub>  
36 from 7.2 to 8.5% (53 to 69 mmol/mol). For the control group, the mean BMI ranged from  
37 25.2 to 36.8 kg/m<sup>2</sup> and the HbA<sub>1c</sub> 7.4 to 8.9% (56 to 74 mmol/mol). Table 3 shows the  
38 mean baseline liver blood tests in the lixisenatide and control groups. The proportion of  
39 patients with elevated ALT ranged from 20 to 77% for the lixisenatide group and from 19 to  
40 75% for the control groups.  
41  
42  
43  
44  
45  
46  
47  
48  
49  
50  
51  
52  
53  
54  
55  
56  
57  
58  
59  
60

1  
2  
3  
4 The duration of therapy ranged from 4 to 76 weeks (mean 29 weeks). Two trials (one  
5 unpublished)[14] were designed to evaluate dose titration. The dose of lixisenatide was 20  
6 microgram once-daily in the remaining trials. Twelve trials compared lixisenatide versus  
7 placebo and three trials compared lixisenatide versus active controls administered once-  
8 daily (liraglutide and sitagliptin) or twice daily (exenatide). The collateral interventions  
9 (background therapy) were metformin (five trials), metformin plus sulphonylurea (four  
10 trials), metformin plus pioglitazone (one trial), insulin (three trials) or diet (one trial). The  
11 collateral interventions were administered equally to the lixisenatide and control groups.  
12  
13  
14  
15  
16  
17  
18  
19  
20  
21  
22  
23  
24

25 All trials used a parallel group design with patients randomised 1:1 or 2:1. All trials used  
26 adequate allocation sequence generation and allocation concealment (central  
27 randomisation of computer-generated random numbers). All trials with a placebo control  
28 were double blind (with blinding of patients and investigators including outcome  
29 assessors). Trials with an active control group were open label. No evidence of attrition  
30 bias (incomplete outcome data), reporting bias (selective reporting) or other biases were  
31 identified.  
32  
33  
34  
35  
36  
37  
38  
39  
40  
41  
42  
43  
44

45 In total, 1,070 patients had elevated ALT at baseline (figure 2). Lixisenatide had a  
46 beneficial effect on normalisation of ALT (risk difference 0.073, 0.01 to 0.14;  $I^2=23%$ ;  
47 number needed to treat 14 patients). The sequential analysis confirmed the primary meta-  
48 analysis when using the traditional 5% level of statistical significance (figure 3), but not  
49 after adjusting for multiple testing (the trial monitoring boundary was not crossed). Mixed  
50 effect multilevel meta-regression analyses of double blind trials (figure 4) found no effect of  
51  
52  
53  
54  
55  
56  
57  
58  
59  
60

1  
2  
3  
4 the metabolic regulation, duration of diabetes or BMI on the overall result ( $P>0.05$  for all  
5  
6 analyses). When the analyses were repeated for RCTs with an active control group,  
7  
8 lixisenatide had a beneficial effect on normalisation of ALT among patients who were  
9  
10 obese ( $P=0.01$ ) or overweight ( $P=0.004$ ), but not among normal weight patients ( $P=0.98$ ).  
11  
12 There was a moderate correlation between change in bodyweight and change in ALT  
13  
14 (regression coefficient = 0.38). The baseline metabolic regulation and duration of diabetes  
15  
16 did not predict the intervention effect. No evidence of small study effects was seen in  
17  
18 regression analysis (Harbord's test  $P=0.26$ ) or funnel plots (figure 5). Subgroup analyses  
19  
20 showed no differences between trials stratified by the publication status, control groups or  
21  
22 collateral interventions.  
23  
24  
25  
26  
27  
28  
29

30 In total, 191 of 303 (37%) patients randomised to lixisenatide and 128 of 216 (41%)  
31  
32 controls achieved normalisation of AST after treatment (0.04; -0.04 to 0.13;  $I^2=9\%$ ).  
33  
34 Lixisenatide had no effect on alkaline phosphatase (-0.10; -0.23 to 0.03), bilirubin (-0.12, -  
35  
36 0.30 to 0.07) or normalisation of all liver blood tests (0.01, -0.01 to 0.03). No differences  
37  
38 between subgroups were identified.  
39  
40  
41  
42  
43  
44

## 45 Discussion

46  
47  
48 This systematic review found a potential beneficial effect of lixisenatide compared with  
49  
50 placebo or active glucose-lowering comparators on ALT levels among patients with type 2  
51  
52 diabetes. Our analysis suggests that for every 14 patients treated with lixisenatide for  
53  
54 about 29 weeks, one additional patient will achieve normalisation of ALT. The risk  
55  
56 difference was small and the sequential analyses did not confirm the findings.  
57  
58  
59  
60

1  
2  
3  
4 Furthermore, none of the trials were specifically designed to evaluate the effects of  
5  
6 lixisenatide on liver blood tests. Liver blood tests were only mildly elevated and patients  
7  
8 with severe liver disease were excluded from the trials. Although the results are promising,  
9  
10 additional evidence is needed to determine if our findings translate to clinical outcome  
11  
12 measures.  
13

14  
15  
16 ALT is included in the diagnostic evaluations and follow-up of patients with NAFLD and  
17  
18 NASH in clinical practice. Nevertheless, the value of this surrogate outcome is debatable  
19  
20 and previous evidence suggests that the sensitivity is low. The strength of our findings is  
21  
22 mainly related to the fact that we were able to retrieve all the necessary data from included  
23  
24 trials. Information on the design and conduct of the trials as well as all outcome measures  
25  
26 were obtained. Our primary outcome measure is objective, which also strengthens our  
27  
28 findings. Lixisenatide only appeared to have an effect on ALT, which is the most sensitive  
29  
30 biochemical marker of NAFLD. Although the included trials were large, only a proportion of  
31  
32 patients had elevated liver blood tests at baseline. In spite of the hypothetical benefit of  
33  
34 lixisenatide on AST, we only found a non-significant trend on this outcome measure. As  
35  
36 expected, no beneficial or detrimental effects were identified when analysing the remaining  
37  
38 liver blood tests.  
39  
40  
41  
42  
43  
44  
45

46 Individual patient data meta-analyses are based on the original research data instead of  
47  
48 data extracted from published reports. The benefits of this approach include a reduced risk  
49  
50 of errors during reporting and data collection as well as the ability to perform the relevant  
51  
52 subgroup and sensitivity analyses. These data can then be re-analysed centrally and, if  
53  
54  
55  
56  
57  
58  
59  
60

1  
2  
3  
4 appropriate, combined in meta-analyses. The quality of such analyses is high.[28 29] For  
5  
6 this reason they are considered to be a 'gold standard' of systematic reviews.[28]  
7  
8  
9

10  
11 Incretin-based therapies such as lixisenatide and other GLP-1RAs are an important part of  
12  
13 the pharmacological treatment of patients with type 2 diabetes. The beneficial effects  
14  
15 include improved glycaemic control as well as beneficial effects on bodyweight, blood  
16  
17 pressure, cholesterol and cardiovascular biomarkers. Lixisenatide is a once-daily GLP-  
18  
19 1RA. The included RCTs found beneficial effects of lixisenatide used as monotherapy or in  
20  
21 combination with metformin, sulphonylureas, thiazolidinediones or basal insulin glargine.  
22  
23 The improved glycaemic control was mainly demonstrated in RCTs with a placebo control.  
24  
25 Conversely, we found that the benefit of lixisenatide on liver blood tests was more  
26  
27 pronounced in RCTs with an active control group. This result suggests that improved  
28  
29 metabolic regulation and reductions in body weight may not be the only reason for the  
30  
31 potentially beneficial effect on lixisenatide on NAFLD.  
32  
33  
34

35  
36 In conclusion, the use of lixisenatide seems to have beneficial effects on liver blood tests  
37  
38 and could possibly have a role in the treatment of patients with NAFLD.  
39  
40  
41  
42  
43  
44  
45  
46  
47  
48  
49  
50  
51  
52  
53  
54  
55  
56  
57  
58  
59  
60

1  
2  
3  
4 **Acknowledgement** Thank you to Elena Nikolova and Edward Wang from Sanofi-Aventis  
5  
6 for their statistical help in retrieving data from included trials.  
7  
8

9  
10 **Funding** This research received no specific grant from any funding agency in the public,  
11 commercial or not-for-profit sectors. Data were received from Sanofi-Aventis. The paper  
12 was sent to Sanofi-Aventis before submission, but the writing, interpretation of data and  
13 conclusions were the sole responsibility of the authors who also made the final decision to  
14 submit the paper for publication.  
15  
16  
17  
18  
19  
20

21  
22 **Contributorship Statement:** LG drafted the paper and performed the statistical analyses.  
23  
24 TV and FK revised the paper. All authors participated in the interpretation of the results  
25 and have approved of the final version.  
26  
27  
28  
29

30  
31 **Competing interests** None of the authors have competing interests specifically related to  
32 the present work. L. Gluud has participated as an investigator in a trial funded by MSD.  
33 F.K. Knop has received research funding from Sanofi-Aventis Deutschland GmbH and  
34 lecture fees from AstraZeneca, Boehringer Ingelheim Pharmaceuticals, Bristol-Myers  
35 Squibb, Eli Lilly and Company, Gilead Sciences, Merck Sharp & Dohme, Novo Nordisk,  
36 Ono Pharmaceuticals, Sanofi, and Zealand Pharma, is part of the Advisory Boards of Eli  
37 Lilly, Bristol-Myers Squibb/AstraZeneca, Novo Nordisk and Zealand Pharma, and has  
38 consulted for AstraZeneca, Gilead Sciences, Ono Pharmaceuticals, Novo Nordisk and  
39 Zealand Pharma. T Vilsbøll has received fees for being part of an advisory board from  
40 AstraZeneca, Boehringer Ingelheim Pharmaceuticals, Bristol-Myers Squibb, Eli Lilly and  
41 Company, GI Dynamics, Inc., Merck Sharp & Dohme, Novo Nordisk, Sanofi and Takeda,  
42  
43  
44  
45  
46  
47  
48  
49  
50  
51  
52  
53  
54  
55  
56  
57  
58  
59  
60



1  
2  
3  
4 and received fees for speaking from AstraZeneca, Boehringer Ingelheim Pharmaceuticals,  
5  
6 Bristol-Myers Squibb, Eli Lilly and Company, Merck Sharp & Dohme, Novo Nordisk,  
7  
8 Novartis, Sanofi, Takeda and Zealand Pharma, and received research support from Novo  
9  
10 Nordisk.  
11

12  
13 **Data Sharing Statement:** Data will be available on request  
14  
15  
16  
17  
18  
19  
20  
21  
22  
23  
24  
25  
26  
27  
28  
29  
30  
31  
32  
33  
34  
35  
36  
37  
38  
39  
40  
41  
42  
43  
44  
45  
46  
47  
48  
49  
50  
51  
52  
53  
54  
55  
56  
57  
58  
59  
60

## REFERENCES

1. Verbeek J, Cassiman D, Lannoo M, et al. Treatment of non-alcoholic fatty liver disease: can we already face the epidemic? *Acta Gastroenterol Belg* 2013;**76**(2):200-9.
2. Parkash O, Hamid S. Are we ready for a new epidemic of under recognized liver disease in South Asia especially in Pakistan? Non alcoholic fatty liver disease. *J Pak Med Assoc* 2013;**63**(1):95-9.
3. Blachier M, Leleu H, Peck-Radosavljevic M, Valla DC, Roudot-Thoraval F. The burden of liver disease in Europe: a review of available epidemiological data. *Journal of hepatology* 2013;**58**(3):593-608.
4. Estep JM, Birerdinc A, Younossi Z. Non-invasive diagnostic tests for non-alcoholic fatty liver disease. *Curr Mol Med* 2010;**10**(2):166-72.
5. Miller MH, Ferguson MA, Dillon JF. Systematic review of performance of non-invasive biomarkers in the evaluation of non-alcoholic fatty liver disease. *Liver Int* 2011;**31**(4):461-73.
6. Barsic N, Lerotic I, Smircic-Duvnjak L, Tomasic V, Duvnjak M. Overview and developments in noninvasive diagnosis of nonalcoholic fatty liver disease. *World J Gastroenterol* 2012;**18**(30):3945-54.
7. Terjung B, Lemnitzer I, Dumoulin FL, et al. Bleeding complications after percutaneous liver biopsy. An analysis of risk factors. *Digestion* 2003;**67**(3):138-45.
8. Copel L, Sosna J, Kruskal JB, Kane RA. Ultrasound-guided percutaneous liver biopsy: indications, risks, and technique. *Surg Technol Int* 2003;**11**:154-60.
9. Angelico F, Burattin M, Alessandri C, Del Ben M, Lirussi F. Drugs improving insulin resistance for non-alcoholic fatty liver disease and/or non-alcoholic steatohepatitis. *Cochrane Database Syst Rev* 2007(1):CD005166.
10. Shyangdan D, Clar C, Ghouri N, et al. Insulin sensitisers in the treatment of non-alcoholic fatty liver disease: a systematic review. *Health Technol Assess* 2011;**15**(38):1-110.
11. Vilsboll T, Christensen M, Junker AE, Knop FK, Gluud LL. Effects of glucagon-like peptide-1 receptor agonists on weight loss: systematic review and meta-analyses of randomised controlled trials. *BMJ* 2012;**344**:d7771.
12. Scott LJ. Lixisenatide: a review of its use in patients with type 2 diabetes mellitus. *BioDrugs* 2013;**27**(5):509-23.
13. Christensen M, Knop FK, Vilsboll T, Holst JJ. Lixisenatide for type 2 diabetes mellitus. *Expert Opin Investig Drugs* 2011;**20**(4):549-57.
14. Lorenz M, Pfeiffer C, Steinstrasser A, et al. Effects of lixisenatide once daily on gastric emptying in type 2 diabetes - Relationship to postprandial glycemia. *Regul Pept* 2013;**185C**:1-8.
15. Ratner RE, Rosenstock J, Boka G. Dose-dependent effects of the once-daily GLP-1 receptor agonist lixisenatide in patients with Type 2 diabetes inadequately controlled with metformin: a randomized, double-blind, placebo-controlled trial. *Diabet Med* 2010;**27**(9):1024-32.
16. Riddle MC, Aronson R, Home P, et al. Adding Once-Daily Lixisenatide for Type 2 Diabetes Inadequately Controlled by Established Basal Insulin A 24-week, randomized, placebo-controlled comparison (GetGoal-L). *Diabetes Care* 2013;**36**(9):2489-96.

17. Riddle MC, Forst T, Aronson R, et al. Adding Once-Daily Lixisenatide for Type 2 Diabetes Inadequately Controlled With Newly Initiated and Continuously Titrated Basal Insulin Glargine A 24-week, randomized, placebo-controlled study (GetGoal-Duo 1). *Diabetes Care* 2013;**36**(9):2497-503.
18. Seino Y, Min KW, Niemoeller E, Takami A. Randomized, double-blind, placebo-controlled trial of the once-daily GLP-1 receptor agonist lixisenatide in Asian patients with type 2 diabetes insufficiently controlled on basal insulin with or without a sulfonylurea (GetGoal-L-Asia). *Diabetes Obes Metab* 2012;**14**(10):910-7.
19. Ahren B, Dimas AL, Miossec P, Saubadu S, Aronson R. Efficacy and Safety of Lixisenatide Once-Daily Morning or Evening Injections in Type 2 Diabetes Inadequately Controlled on Metformin (GetGoal-M). *Diabetes Care* 2013;**36**(9):2543-50.
20. Fonseca VA, Alvarado-Ruiz R, Raccach D, Boka G, Miossec P, Gerich JE. Efficacy and safety of the once-daily GLP-1 receptor agonist lixisenatide in monotherapy: a randomized, double-blind, placebo-controlled trial in patients with type 2 diabetes (GetGoal-Mono). *Diabetes Care* 2012;**35**(6):1225-31.
21. Kapitza C, Forst T, Coester HV, Poitiers F, Ruus P, Hincelin-Mery A. Pharmacodynamic characteristics of lixisenatide once daily versus liraglutide once daily in patients with type 2 diabetes insufficiently controlled on metformin. *Diabetes Obes. Metab.* 2013;**15**(7):642-49.
22. Rosenstock J, Raccach D, Koranyi L, et al. Efficacy and Safety of Lixisenatide Once Daily Versus Exenatide Twice Daily in Type 2 Diabetes Inadequately Controlled on Metformin: A 24-Week, Randomized, Open-Label, Active-Controlled Study (GetGoal-X). *Diabetes Care* 2013.
23. Pinget M, Goldenberg R, Niemoeller E, Muehlen-Bartmer I, Guo H, Aronson R. Efficacy and safety of lixisenatide once daily versus placebo in type 2 diabetes insufficiently controlled on pioglitazone (GetGoal-P). *Diabetes Obes Metab* 2013.
24. Bolli GB, Munteanu M, Dotsenko S, et al. Efficacy and safety of lixisenatide once daily vs. placebo in people with Type 2 diabetes insufficiently controlled on metformin (GetGoal-F1). *Diabet Med* 2013.
25. Ratner REH, M.; Shamanna, P.; Min, K.; Boka, G.; Miossec, P.; Muehlen-Bartmer, I.; Rosenstock, J.; . Efficacy and safety of lixisenatide once daily versus placebo in patients with T2DM insufficiently controlled on sulfonylurea + metformin (GetGoal-S). *Diabetologia* 2011;**54**(11):785.
26. Seino YT, A.; Niemoeller, E.; Sakaki, T.; on behalf of the GetGoal-Mono Study Group. Long-term Safety of Once-daily (QD) Lixisenatide in Japanese Patients with Type 2 Diabetes Mellitus (T2DM): GetGoal-Mono Japan. <http://www.aa-sd.org/> 2012.
27. Pan CYS, S.; Niemoeller, E.; on behalf of the GetGoal-M Asia Study Investigators. Lixisenatide in Asian Patients with Type 2 Diabetes (T2DM) Uncontrolled on Metformin ± Sulfonylurea (SU): GetGoal-M Asia. <http://www.aa-sd.org/> 2012.
28. <http://handbook.cochrane.org/>. Cochrane Handbook for Systematic Reviews of Interventions. Secondary Cochrane Handbook for Systematic Reviews of Interventions.
29. Stewart GB, Altman DG, Askie LM, Duley L, Simmonds MC, Stewart LA. Statistical analysis of individual participant data meta-analyses: a comparison of methods and recommendations for practice. *PLoS One* 2012;**7**(10):e46042.

## Legends to figures

1  
2  
3  
4 **Figure 1** Trial flow chart.

5  
6 **Figure 2** Random effects meta-analysis of randomised controlled trials on normalisation of  
7  
8 alanine aminotransferase (ALT). The intervention comparisons are lixisenatide versus  
9  
10 placebo or active interventions. The included patients have type 2 diabetes and elevated  
11  
12 ALT at baseline. The outcome measure is normalisation of ALT.

13  
14 **Figure 3** Sequential analysis of risk ratios (random effects) in randomised controlled trials  
15  
16 on lixisenatide versus placebo or active interventions for patients with type 2 diabetes and  
17  
18 elevated alanine aminotransferase (ALT) at baseline. The outcome measure is  
19  
20 normalisation of ALT. The analysis shows that lixisenatide has a beneficial effect on  
21  
22 normalisation of ALT when assessed using the traditional 5% level of significance (the  
23  
24 horizontal line), but not after adjusting for cumulative assessment (the trial monitoring  
25  
26 boundary).

27  
28  
29  
30 **Figure 4** Mixed model meta-regression analysis of the effect of lixisenatide versus placebo  
31  
32 on normalisation of alanine aminotransferase (ALT). Included patients have type 2  
33  
34 diabetes and elevated ALT at baseline. The figure shows the estimated intervention effect  
35  
36 (normalisation of ALT) on the log-odds ratio scale in relation to the baseline body weight of  
37  
38 included patients from 12 placebo controlled randomised controlled trials. The size (area)  
39  
40 of each circle is inversely proportional to the variance of the log-odds ratio (the larger the  
41  
42 circle the less the variance).

43  
44  
45  
46 **Figure 5** Funnel plot including randomised controlled trials on lixisenatide for patients with  
47  
48 type 2 diabetes. The outcome measure is normalisation of alanine aminotransferase  
49  
50 (ALT). The figure shows the estimated intervention (Risk Difference) effect with its  
51  
52 associated standard error (seRD).  
53  
54  
55  
56  
57  
58  
59  
60

1  
2  
3  
4  
5  
6  
7  
8  
9  
10  
11  
12  
13  
14  
15  
16  
17  
18  
19  
20  
21  
22  
23  
24  
25  
26  
27  
28  
29  
30  
31  
32  
33  
34  
35  
36  
37  
38  
39  
40  
41  
42  
43  
44  
45  
46  
47  
48  
49  
50  
51  
52  
53  
54  
55  
56  
57  
58  
59  
60

For peer review only

**Effects of the glucagon-like peptide-1 receptor agonist lixisenatide on liver blood tests: systematic review with individual patient data meta-analysis of randomised controlled trials. Gluud et al**

**Table 1 Characteristics of included trials**

| <b>Trial</b>              | <b>Publication status</b> | <b>Control</b> | <b>Collateral interventions*</b> | <b>Duration</b> |
|---------------------------|---------------------------|----------------|----------------------------------|-----------------|
| Lorenz 2013 ACT6011 QD    | Full paper                | Placebo        | Sulfonulureas ± metformin        | 4               |
| Ratner 2010 DRI6012 QD    | Full paper                | Placebo        | Metformin                        | 24              |
| Pan 2012 GetGoal-M-Asia   | Abstract                  | Placebo        | Sulfonulureas ± metformin        | 24              |
| Riddle 2013 GetGoal-Duo1  | Full paper                | Placebo        | Insulin                          | 24              |
| Riddle 2013 GetGoal-L     | Full paper                | Placebo        | Insulin                          | 24              |
| Seino 2012 GetGoal-L-Asia | Full paper                | Placebo        | Insulin                          | 24              |
| Ahren 2013 GetGoal-M      | Full paper                | Placebo        | Metformin                        | 24              |
| Fonseca 2012 GetGoal-Mono | Full paper                | Placebo        | Diet                             | 24              |
| Ratner 2012 GetGoal-S     | Abstract                  | Placebo        | Sulfonulureas ± metformin        | 76              |
| PDY6797 QD                | Unpublished               | Placebo        | Sulfonulureas ± metformin        | 76              |
| Rosenstock 2013 GetGoal-X | Full paper                | Exenatide      | Metformin                        | 24              |
| Kapitza 2013 PDY10931     | Full paper                | Liraglutide    | Metformin                        | 4               |
| Seino 2012 EFC10780       | Full paper                | Sitagliptin    | Metformin                        | 24              |
| Pinget 2013 GetGoal-P     | Full paper                | Placebo        | Pioglitazone ±metformin          | 24              |
| Bolli 2013 GetGoal-F1     | Full paper                | Placebo        | Metformin                        | 24              |

\*Collateral interventions were administered equally to the lixisenatide and control groups

**Effects of the glucagon-like peptide-1 receptor agonist lixisenatide on liver blood tests: systematic review with individual patient data meta-analysis of randomised controlled trials. Gluud et al**

**Table 2 Characteristics of included patients (mean and standard deviation)**

| Trial                        | Body Mass Index |      |          |      | Weight       |       |          |       | Glycated haemoglobin |      |          |      |
|------------------------------|-----------------|------|----------|------|--------------|-------|----------|-------|----------------------|------|----------|------|
|                              | Lixisenatide    |      | Controls |      | Lixisenatide |       | Controls |       | Lixisenatide         |      | Controls |      |
|                              | Mean            | SD   | Mean     | SD   | Mean         | SD    | Mean     | SD    | Mean                 | SD   | Mean     | SD   |
| Lorenz 2013<br>ACT6011 QD    | 31.38           | 4.05 | 29.77    | 3.76 | 89.40        | 14.66 | 83.80    | 14.68 | 8.54                 | 1.07 | 8.87     | 1.07 |
| Ratner 2010<br>DRI6012 QD    | 32.01           | 4.28 | 31.74    | 4.15 | 89.37        | 17.00 | 87.68    | 13.63 | 7.58                 | 0.65 | 7.53     | 0.63 |
| Bolli 2013<br>GetGoal-F1     | 32.53           | 5.36 | 32.37    | 5.45 | 88.81        | 17.98 | 87.87    | 17.37 | 8.05                 | 0.88 | 8.03     | 0.82 |
| Riddle 2013<br>GetGoal-Duo1  | 31.99           | 6.63 | 31.65    | 6.01 | 87.31        | 21.76 | 86.75    | 20.41 | 7.56                 | 0.55 | 7.60     | 0.54 |
| Seino 2012<br>GetGoal-L-Asia | 25.36           | 3.69 | 25.15    | 3.94 | 65.93        | 13.00 | 65.60    | 12.47 | 8.54                 | 0.73 | 8.52     | 0.78 |
| Pan 2012<br>GetGoal-M-Asia   | 26.75           | 3.86 | 27.08    | 3.75 | 73.18        | 13.93 | 72.74    | 13.64 | 7.95                 | 0.81 | 7.85     | 0.71 |
| Ahren 2013<br>GetGoal-M      | 32.84           | 6.34 | 33.12    | 6.45 | 89.57        | 20.91 | 90.15    | 20.14 | 8.06                 | 0.89 | 8.06     | 0.90 |
| Ratner 2012<br>GetGoal-S     | 30.13           | 6.62 | 30.42    | 6.64 | 82.30        | 21.76 | 84.42    | 22.83 | 8.28                 | 0.86 | 8.21     | 0.84 |
| Riddle 2013<br>GetGoal-L     | 31.91           | 6.17 | 32.56    | 6.32 | 87.10        | 20.01 | 88.94    | 20.84 | 8.42                 | 0.88 | 8.37     | 0.84 |
| Pinget 2013<br>GetGoal-P     | 33.66           | 6.71 | 34.44    | 7.04 | 92.93        | 22.90 | 96.74    | 25.58 | 8.08                 | 0.90 | 8.06     | 0.79 |

1  
2  
3  
4  
5  
6  
7  
8  
9  
10  
11  
12  
13  
14  
15  
16  
17  
18  
19  
20  
21  
22  
23  
24  
25  
26  
27  
28  
29  
30  
31  
32  
33  
34  
35  
36  
37  
38  
39  
40  
41  
42  
43  
44  
45  
46  
47  
48  
49

**Effects of the glucagon-like peptide-1 receptor agonist lixisenatide on liver blood tests: systematic review with individual patient data meta-analysis of randomised controlled trials. Gluud et al**

|                 |       |      |       |      |       |       |        |       |      |      |      |      |
|-----------------|-------|------|-------|------|-------|-------|--------|-------|------|------|------|------|
| Fonseca 2012    | 31.99 | 6.66 | 31.76 | 6.69 | 87.77 | 21.58 | 86.08  | 22.21 | 8.03 | 0.89 | 8.07 | 0.91 |
| GetGoal-Mono    |       |      |       |      |       |       |        |       |      |      |      |      |
| PDY6797         | 25.09 | 3.65 | 26.39 | 3.50 | 71.54 | 16.77 | 76.92  | 16.07 | 8.19 | 0.82 | 8.38 | 0.75 |
| Rosenstock 2013 | 33.68 | 6.27 | 33.51 | 6.54 | 94.01 | 19.63 | 96.09  | 22.52 | 7.95 | 0.81 | 7.97 | 0.78 |
| GetGoal-X       |       |      |       |      |       |       |        |       |      |      |      |      |
| Seino 2012      | 36.76 | 7.25 | 36.76 | 6.34 | 98.51 | 23.48 | 100.56 | 23.77 | 8.16 | 0.89 | 8.09 | 0.96 |
| EFC10780        |       |      |       |      |       |       |        |       |      |      |      |      |
| Kapitza 2013    | 31.23 | 3.93 | 31.33 | 4.08 | 91.16 | 15.28 | 92.88  | 16.59 | 7.20 | 0.63 | 7.41 | 0.81 |
| PDY10931        |       |      |       |      |       |       |        |       |      |      |      |      |

For peer review only



**Effects of the glucagon-like peptide-1 receptor agonist lixisenatide on liver blood tests: systematic review with individual patient data meta-analysis of randomised controlled trials. Gluud et al**

**Table 3 Baseline liver blood tests (mean and standard deviation, SD)**

| Trial                        | Alanine aminotransferase |       |          |       | Aspartate aminotransferase |       |          |       | Alkaline phosphatase |       |          |       |
|------------------------------|--------------------------|-------|----------|-------|----------------------------|-------|----------|-------|----------------------|-------|----------|-------|
|                              | Lixisenatide             |       | Controls |       | Lixisenatide               |       | Controls |       | Lixisenatide         |       | Controls |       |
|                              | Mean                     | SD    | Mean     | SD    | Mean                       | SD    | Mean     | SD    | Mean                 | SD    | Mean     | SD    |
| Lorenz 2013<br>ACT6011 QD    | 25.48                    | 8.18  | 25.91    | 12.50 | 19.43                      | 4.95  | 19.23    | 4.62  | 83.52                | 27.00 | 83.55    | 19.43 |
| Ratner 2010<br>DRI6012 QD    | 28.31                    | 19.42 | 25.24    | 13.94 | 24.65                      | 15.38 | 23.49    | 11.35 | 73.60                | 28.28 | 75.47    | 41.00 |
| Bolli 2013<br>GetGoal-F1     | 30.69                    | 16.34 | 29.34    | 15.41 | 23.93                      | 10.30 | 23.62    | 10.68 | 72.83                | 21.58 | 74.54    | 21.23 |
| Riddle 2013<br>GetGoal-Duo1  | 23.93                    | 17.09 | 24.71    | 12.90 | 21.16                      | 8.81  | 21.67    | 8.64  | 71.18                | 21.65 | 70.95    | 23.29 |
| Seino 2012<br>GetGoal-L-Asia | 25.19                    | 12.85 | 23.03    | 10.34 | 22.78                      | 7.56  | 21.43    | 7.79  | 71.90                | 17.59 | 71.01    | 20.11 |
| Pan 2012<br>GetGoal-M-Asia   | 31.36                    | 19.32 | 32.82    | 20.69 | 24.13                      | 11.07 | 25.14    | 11.08 | 78.89                | 21.60 | 80.48    | 26.75 |
| Ahren 2013<br>GetGoal-M      | 31.08                    | 16.58 | 33.48    | 46.58 | 24.38                      | 11.74 | 26.12    | 22.07 | 78.88                | 24.24 | 74.65    | 25.15 |
| Ratner 2012<br>GetGoal-S     | 26.93                    | 12.56 | 27.72    | 12.64 | 21.45                      | 7.09  | 21.54    | 7.20  | 73.40                | 21.41 | 72.69    | 22.69 |
| Riddle 2013<br>GetGoal-L     | 26.57                    | 17.61 | 25.92    | 12.57 | 22.88                      | 12.13 | 22.31    | 7.76  | 81.38                | 25.84 | 78.56    | 25.43 |
| Pinget 2013                  | 24.66                    | 12.01 | 24.59    | 10.86 | 21.46                      | 8.93  | 21.48    | 8.27  | 75.24                | 29.68 | 73.13    | 22.49 |

**Effects of the glucagon-like peptide-1 receptor agonist lixisenatide on liver blood tests: systematic review with individual patient data meta-analysis of randomised controlled trials. Gluud et al**

|                 |       |       |       |       |       |       |       |       |       |       |       |       |
|-----------------|-------|-------|-------|-------|-------|-------|-------|-------|-------|-------|-------|-------|
| GetGoal-P       |       |       |       |       |       |       |       |       |       |       |       |       |
| Fonseca 2012    | 29.74 | 16.05 | 25.43 | 11.40 | 23.71 | 11.78 | 21.91 | 7.40  | 78.95 | 21.10 | 80.07 | 26.42 |
| GetGoal-Mono    |       |       |       |       |       |       |       |       |       |       |       |       |
| PDY6797         | 23.72 | 11.15 | 27.00 | 14.67 | 23.97 | 15.33 | 23.73 | 9.52  | 61.59 | 14.64 | 70.73 | 18.19 |
| Seino 2012      | 35.70 | 20.63 | 39.83 | 23.64 | 25.50 | 13.76 | 28.74 | 20.54 | 81.97 | 25.11 | 83.61 | 28.13 |
| EFC10780        |       |       |       |       |       |       |       |       |       |       |       |       |
| Rosenstock 2013 | 28.50 | 13.06 | 30.65 | 15.83 | 22.17 | 7.92  | 23.28 | 9.27  | 72.43 | 22.13 | 72.15 | 19.86 |
| GetGoal-X       |       |       |       |       |       |       |       |       |       |       |       |       |
| Kapitza 2013    | 33.88 | 16.36 | 34.23 | 16.99 | 27.31 | 13.47 | 26.45 | 9.07  | 67.56 | 16.62 | 67.58 | 20.07 |
| PDY10931        |       |       |       |       |       |       |       |       |       |       |       |       |

1  
2  
3  
4  
5  
6  
7  
8  
9  
10  
11  
12  
13  
14  
15  
16  
17  
18  
19  
20  
21  
22  
23  
24  
25  
26  
27  
28  
29  
30  
31  
32  
33  
34  
35  
36  
37  
38  
39  
40  
41  
42  
43  
44  
45  
46  
47  
48  
49

Figure 1

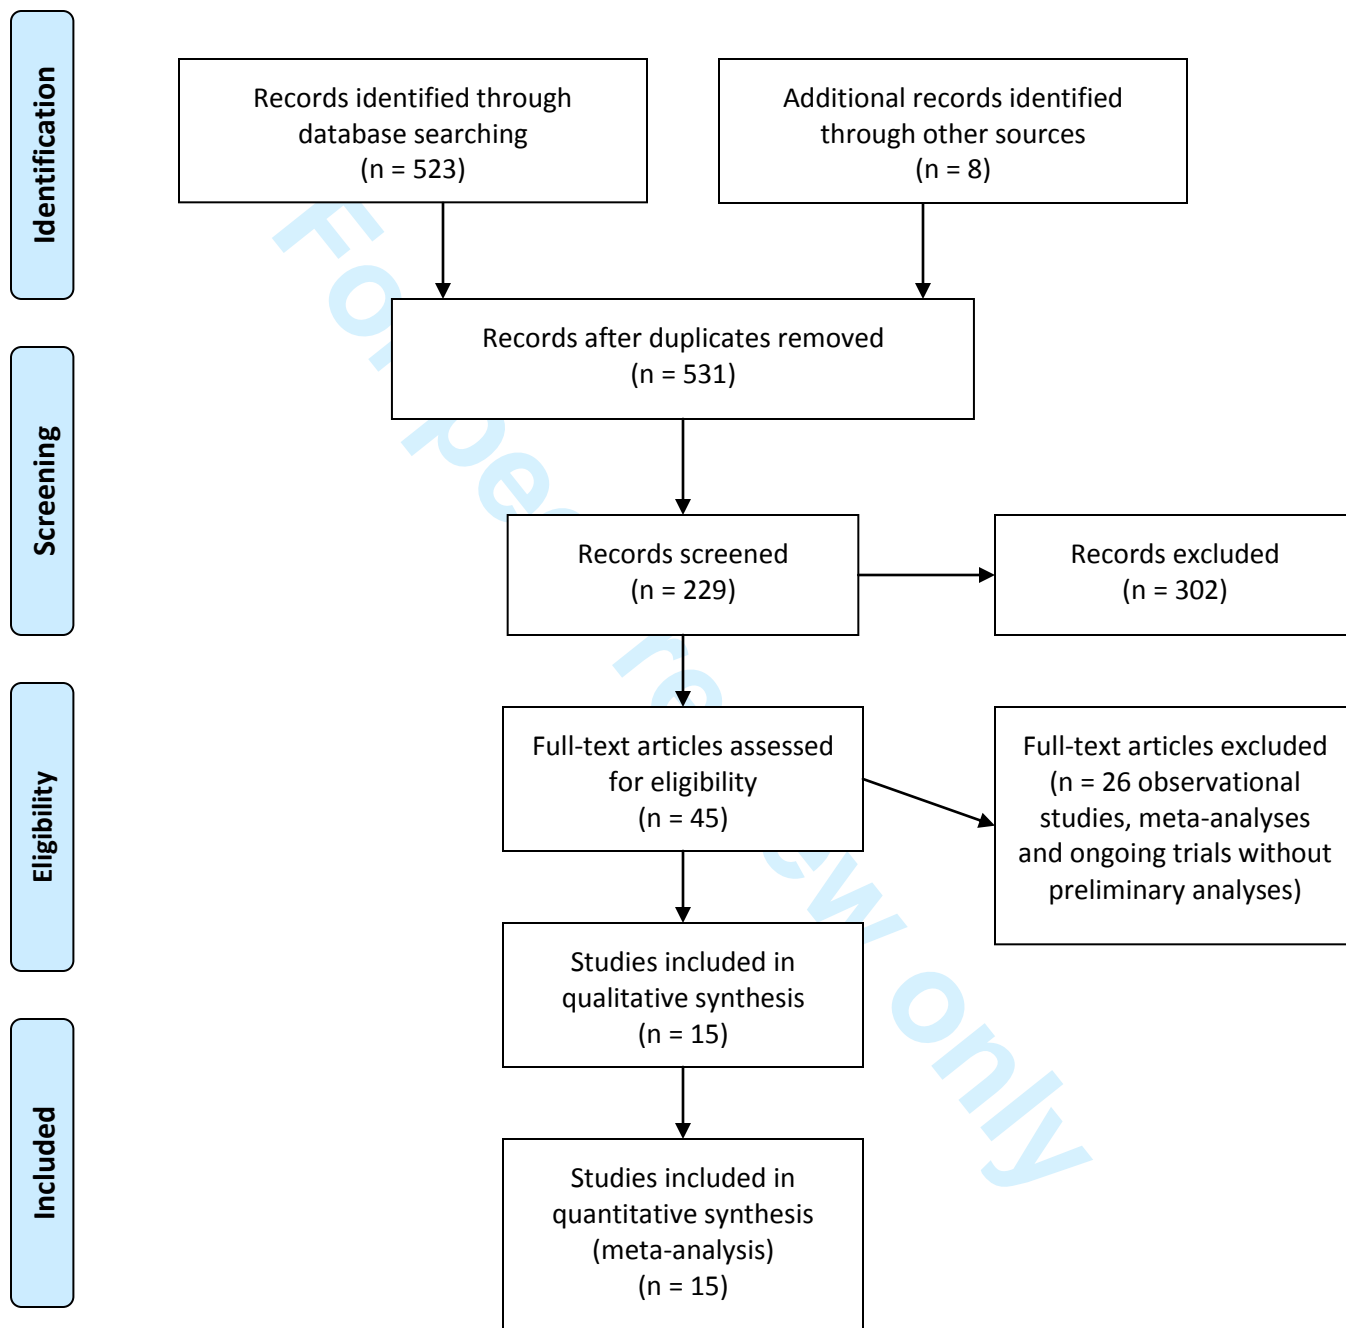

From: Moher D, Liberati A, Tetzlaff J, Altman DG, The PRISMA Group (2009). Preferred Reporting Items for Systematic Reviews and Meta-Analyses: The PRISMA Statement. PLoS Med 6(6): e1000097. doi:10.1371/journal.pmed1000097

1  
2  
3  
4  
5  
6  
7  
8  
9  
10  
11  
12  
13  
14  
15  
16  
17  
18  
19  
20  
21  
22  
23  
24  
25  
26  
27  
28  
29  
30  
31  
32  
33  
34  
35  
36  
37  
38  
39  
40  
41  
42  
43  
44  
45  
46  
47  
48  
49  
50  
51  
52  
53  
54  
55  
56  
57  
58  
59  
60

Figure 2

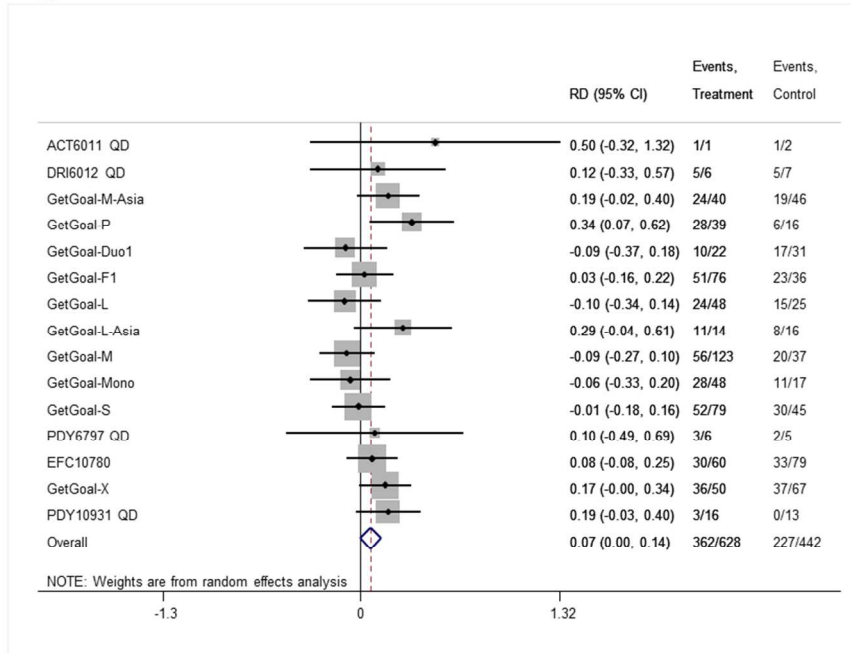

254x190mm (96 x 96 DPI)

Review only

Figure 3

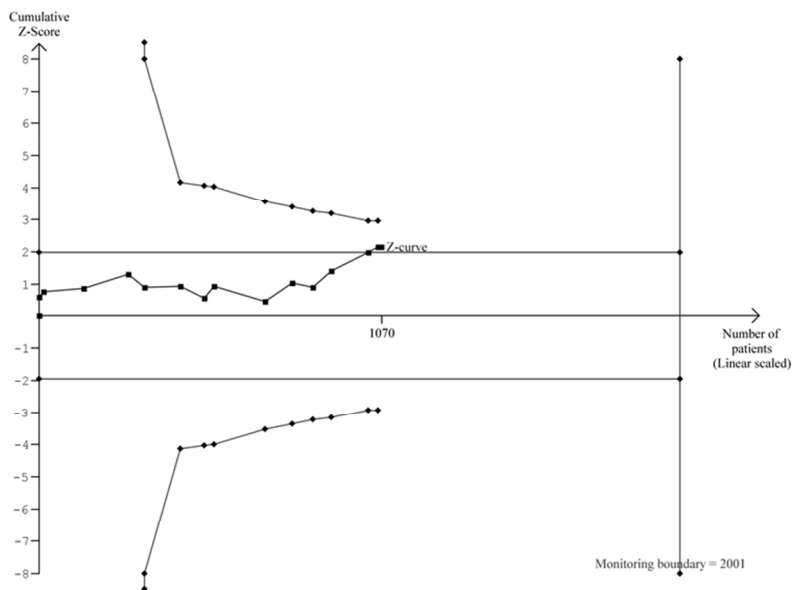

254x190mm (96 x 96 DPI)

ew only

1  
2  
3  
4  
5  
6  
7  
8  
9  
10  
11  
12  
13  
14  
15  
16  
17  
18  
19  
20  
21  
22  
23  
24  
25  
26  
27  
28  
29  
30  
31  
32  
33  
34  
35  
36  
37  
38  
39  
40  
41  
42  
43  
44  
45  
46  
47  
48  
49  
50  
51  
52  
53  
54  
55  
56  
57  
58  
59  
60

Figure 4

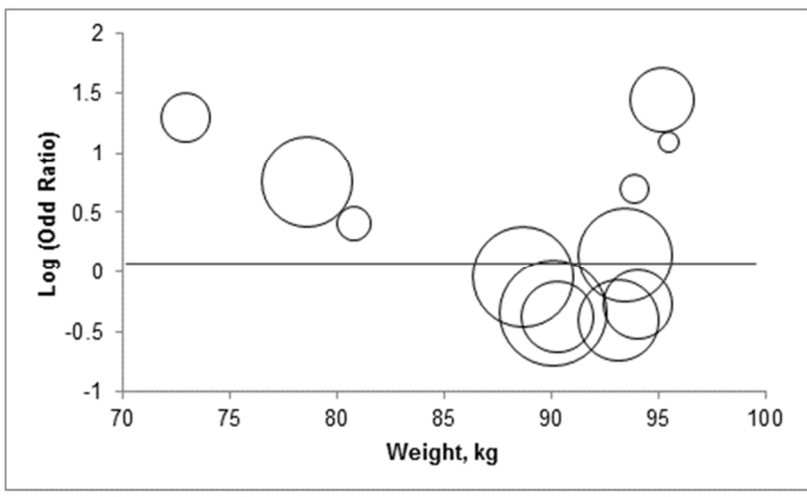

254x190mm (96 x 96 DPI)

ew only

1  
2  
3  
4  
5  
6  
7  
8  
9  
10  
11  
12  
13  
14  
15  
16  
17  
18  
19  
20  
21  
22  
23  
24  
25  
26  
27  
28  
29  
30  
31  
32  
33  
34  
35  
36  
37  
38  
39  
40  
41  
42  
43  
44  
45  
46  
47  
48  
49  
50  
51  
52  
53  
54  
55  
56  
57  
58  
59  
60

Figure 5

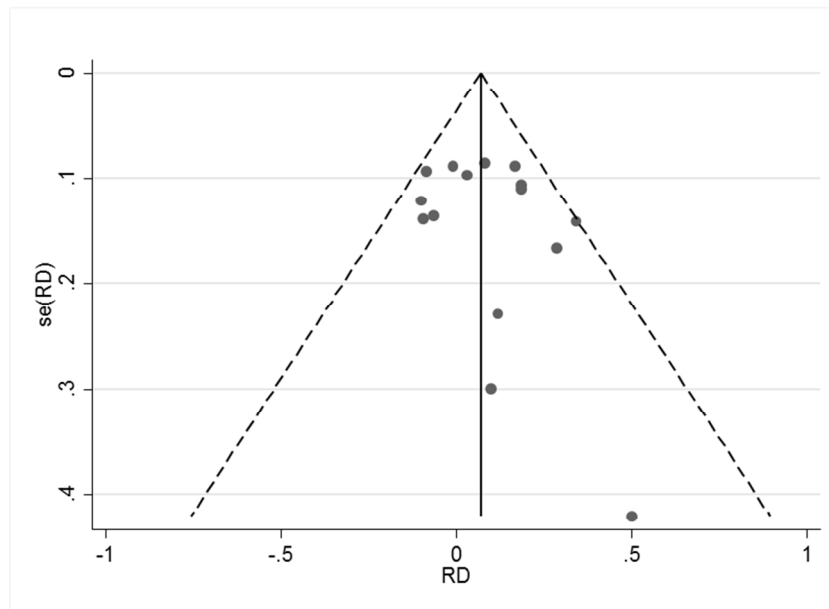

254x190mm (96 x 96 DPI)

Review only

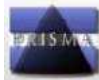

# PRISMA 2009 Checklist

1  
2  
3  
4  
5  
6  
7  
8  
9  
10  
11  
12  
13  
14  
15  
16  
17  
18  
19  
20  
21  
22  
23  
24  
25  
26  
27  
28  
29  
30  
31  
32  
33  
34  
35  
36  
37  
38  
39  
40  
41  
42  
43  
44  
45  
46  
47  
48  
49

| Section/topic                      | #  | Checklist item                                                                                                                                                                                                                                                                                              | Reported on page # |
|------------------------------------|----|-------------------------------------------------------------------------------------------------------------------------------------------------------------------------------------------------------------------------------------------------------------------------------------------------------------|--------------------|
| <b>TITLE</b>                       |    |                                                                                                                                                                                                                                                                                                             |                    |
| Title                              | 1  | Identify the report as a systematic review, meta-analysis, or both.                                                                                                                                                                                                                                         | 1                  |
| <b>ABSTRACT</b>                    |    |                                                                                                                                                                                                                                                                                                             |                    |
| Structured summary                 | 2  | Provide a structured summary including, as applicable: background; objectives; data sources; study eligibility criteria, participants, and interventions; study appraisal and synthesis methods; results; limitations; conclusions and implications of key findings; systematic review registration number. | 3-4                |
| <b>INTRODUCTION</b>                |    |                                                                                                                                                                                                                                                                                                             |                    |
| Rationale                          | 3  | Describe the rationale for the review in the context of what is already known.                                                                                                                                                                                                                              | 5-6                |
| Objectives                         | 4  | Provide an explicit statement of questions being addressed with reference to participants, interventions, comparisons, outcomes, and study design (PICOS).                                                                                                                                                  | 6                  |
| <b>METHODS</b>                     |    |                                                                                                                                                                                                                                                                                                             |                    |
| Protocol and registration          | 5  | Indicate if a review protocol exists, if and where it can be accessed (e.g., Web address), and, if available, provide registration information including registration number.                                                                                                                               | 6                  |
| Eligibility criteria               | 6  | Specify study characteristics (e.g., PICOS, length of follow-up) and report characteristics (e.g., years considered, language, publication status) used as criteria for eligibility, giving rationale.                                                                                                      | 6-7                |
| Information sources                | 7  | Describe all information sources (e.g., databases with dates of coverage, contact with study authors to identify additional studies) in the search and date last searched.                                                                                                                                  | 7                  |
| Search                             | 8  | Present full electronic search strategy for at least one database, including any limits used, such that it could be repeated.                                                                                                                                                                               | 7                  |
| Study selection                    | 9  | State the process for selecting studies (i.e., screening, eligibility, included in systematic review, and, if applicable, included in the meta-analysis).                                                                                                                                                   | 6-7                |
| Data collection process            | 10 | Describe method of data extraction from reports (e.g., piloted forms, independently, in duplicate) and any processes for obtaining and confirming data from investigators.                                                                                                                                  | 6-7                |
| Data items                         | 11 | List and define all variables for which data were sought (e.g., PICOS, funding sources) and any assumptions and simplifications made.                                                                                                                                                                       | 6-7                |
| Risk of bias in individual studies | 12 | Describe methods used for assessing risk of bias of individual studies (including specification of whether this was done at the study or outcome level), and how this information is to be used in any data synthesis.                                                                                      | 7                  |
| Summary measures                   | 13 | State the principal summary measures (e.g., risk ratio, difference in means).                                                                                                                                                                                                                               | 8-9                |
| Synthesis of results               | 14 | Describe the methods of handling data and combining results of studies, if done, including measures of consistency (e.g., $I^2$ for each meta-analysis).                                                                                                                                                    | 8-9                |



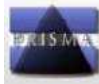

# PRISMA 2009 Checklist

Page 1 of 2

| Section/topic                 | #  | Checklist item                                                                                                                                                                                           | Reported on page # |
|-------------------------------|----|----------------------------------------------------------------------------------------------------------------------------------------------------------------------------------------------------------|--------------------|
| Risk of bias across studies   | 15 | Specify any assessment of risk of bias that may affect the cumulative evidence (e.g., publication bias, selective reporting within studies).                                                             | 8-9                |
| Additional analyses           | 16 | Describe methods of additional analyses (e.g., sensitivity or subgroup analyses, meta-regression), if done, indicating which were pre-specified.                                                         | 8-9                |
| <b>RESULTS</b>                |    |                                                                                                                                                                                                          |                    |
| Study selection               | 17 | Give numbers of studies screened, assessed for eligibility, and included in the review, with reasons for exclusions at each stage, ideally with a flow diagram.                                          | 9                  |
| Study characteristics         | 18 | For each study, present characteristics for which data were extracted (e.g., study size, PICOS, follow-up period) and provide the citations.                                                             | 9-10 and tables    |
| Risk of bias within studies   | 19 | Present data on risk of bias of each study and, if available, any outcome level assessment (see item 12).                                                                                                | 8                  |
| Results of individual studies | 20 | For all outcomes considered (benefits or harms), present, for each study: (a) simple summary data for each intervention group (b) effect estimates and confidence intervals, ideally with a forest plot. | 10-11 and figures  |
| Synthesis of results          | 21 | Present results of each meta-analysis done, including confidence intervals and measures of consistency.                                                                                                  | 10-11 and figures  |
| Risk of bias across studies   | 22 | Present results of any assessment of risk of bias across studies (see Item 15).                                                                                                                          | 8                  |
| Additional analysis           | 23 | Give results of additional analyses, if done (e.g., sensitivity or subgroup analyses, meta-regression [see Item 16]).                                                                                    | 10-11              |
| <b>DISCUSSION</b>             |    |                                                                                                                                                                                                          |                    |
| Summary of evidence           | 24 | Summarize the main findings including the strength of evidence for each main outcome; consider their relevance to key groups (e.g., healthcare providers, users, and policy makers).                     | 11-13              |
| Limitations                   | 25 | Discuss limitations at study and outcome level (e.g., risk of bias), and at review-level (e.g., incomplete retrieval of identified research, reporting bias).                                            | 11-13              |
| Conclusions                   | 26 | Provide a general interpretation of the results in the context of other evidence, and implications for future research.                                                                                  | 11-13              |
| <b>FUNDING</b>                |    |                                                                                                                                                                                                          |                    |
| Funding                       | 27 | Describe sources of funding for the systematic review and other support (e.g., supply of data); role of funders for the systematic review.                                                               | 14                 |

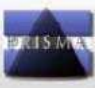

# PRISMA 2009 Checklist

1  
2  
3  
4  
5  
6  
7  
8  
9  
10  
11  
12  
13  
14  
15  
16  
17  
18  
19  
20  
21  
22  
23  
24  
25  
26  
27  
28  
29  
30  
31  
32  
33  
34  
35  
36  
37  
38  
39  
40  
41  
42  
43  
44  
45  
46  
47  
48  
49

doi:10.1371/journal.pmed1000097

For more information, visit: [www.prisma-statement.org](http://www.prisma-statement.org).

Page 2 of 2

For peer review only

# BMJ Open

## Effects of lixisenatide on elevated liver transaminases: systematic review with individual patient data meta- analysis of randomised controlled trials on patients with type 2 diabetes

|                                 |                                                                                                                                                                                                                                                                                             |
|---------------------------------|---------------------------------------------------------------------------------------------------------------------------------------------------------------------------------------------------------------------------------------------------------------------------------------------|
| Journal:                        | <i>BMJ Open</i>                                                                                                                                                                                                                                                                             |
| Manuscript ID:                  | bmjopen-2014-005325.R1                                                                                                                                                                                                                                                                      |
| Article Type:                   | Research                                                                                                                                                                                                                                                                                    |
| Date Submitted by the Author:   | 17-Jul-2014                                                                                                                                                                                                                                                                                 |
| Complete List of Authors:       | Gluud, Lise; Department of Gastroenterology, Knop, Filip; Gentofte Hospital, University of Copenhagen, Diabetes Research Division, Department of Internal Medicine Vilsbøll, Tina; Gentofte Hospital, University of Copenhagen, Diabetes Research Division, Department of Internal Medicine |
| <b>Primary Subject Heading</b>: | Diabetes and endocrinology                                                                                                                                                                                                                                                                  |
| Secondary Subject Heading:      | Gastroenterology and hepatology                                                                                                                                                                                                                                                             |
| Keywords:                       | General diabetes < DIABETES & ENDOCRINOLOGY, Adult gastroenterology < GASTROENTEROLOGY, Hepatobiliary disease < GASTROENTEROLOGY, Hepatology < INTERNAL MEDICINE                                                                                                                            |
|                                 |                                                                                                                                                                                                                                                                                             |

SCHOLARONE™  
Manuscripts

1  
2  
3  
4  
5  
6  
7  
8  
9  
10  
11  
12  
13  
14  
15  
16  
17  
18  
19  
20  
21  
22  
23  
24  
25  
26  
27  
28  
29  
30  
31  
32  
33  
34  
35  
36  
37  
38  
39  
40  
41  
42  
43  
44  
45  
46  
47  
48  
49  
50  
51  
52  
53  
54  
55  
56  
57  
58  
59  
60

**Effects of the glucagon-like peptide-1 receptor agonist lixisenatide on liver blood tests: systematic review with individual patient data meta-analysis of randomised controlled trials. Gluud et al**

**Effects of lixisenatide on elevated liver transaminases: systematic review with individual patient data meta-analysis of randomised controlled trials on patients with type 2 diabetes**

Lise L. Gluud<sup>1,2</sup>, Filip K. Knop<sup>1</sup>, Tina Vilsbøll<sup>1</sup>

<sup>1</sup>Diabetes Research Centre, Department of Medicine, Gentofte Hospital, University of Copenhagen, Denmark

<sup>2</sup>Department of Gastroenterology, Hvidovre Hospital, University of Copenhagen, Denmark

*L.L. Gluud, Consultant, DMSc*

*F.K. Knop, Associate Professor, Specialist Registrar, PhD*

*T. Vilsbøll, Professor, Consultant, DMSc*

Running Head: Lixisenatide for type 2 diabetes and elevated liver blood tests

Correspondence to: L.L. Gluud, Department of Gastroenterology, Copenhagen University Hospital Hvidovre, Kettegaards Alle 30, DK-2650 Hvidovre, Denmark; [liselottegluud@yahoo.dk](mailto:liselottegluud@yahoo.dk)

Key words: Non-alcoholic fatty liver disease, non-alcoholic steatohepatitis, meta-analysis, insulin resistance, type 2 diabetes, alanine aminotransferase.

1  
2  
3  
4  
5  
6  
7  
8  
9  
10  
11  
12  
13  
14  
15  
16  
17  
18  
19  
20  
21  
22  
23  
24  
25  
26  
27  
28  
29  
30  
31  
32  
33  
34  
35  
36  
37  
38  
39  
40  
41  
42  
43  
44  
45  
46  
47  
48  
49  
50  
51  
52  
53  
54  
55  
56  
57  
58  
59  
60

## Effects of the glucagon-like peptide-1 receptor agonist lixisenatide on liver blood tests: systematic review with individual patient data meta-analysis of randomised controlled trials. Gluud et al

Word count: Abstract: 241; Text: 3324

### Abstract

**Objective** To evaluate the effects of the glucagon-like peptide-1 receptor agonist lixisenatide on elevated liver blood tests in patients with type 2 diabetes.

**Design** Systematic review.

**Data sources** Electronic and manual searches were combined.

**Study selection** Randomised controlled trials (RCTs) on lixisenatide versus placebo or active comparators for type 2 diabetes were included.

**Participants** Individual patient data were retrieved to calculate outcomes for patients with elevated liver blood tests.

**Main outcome measures** Normalisation of alanine aminotransferase (ALT) and aspartate aminotransferase.

**Data Synthesis** The results of included trials were combined in meta-analyses. Sequential, subgroup and regression analyses were performed to evaluate heterogeneity and bias.

**Results** We included 12 RCTs on lixisenatide versus placebo and three RCTs with the active comparators liraglutide, exenatide, or sitagliptin. The mean treatment duration was 29 weeks. Lixisenatide increased the proportion of patients with normalisation of ALT (risk difference: 0.07; 95% confidence interval: 0.01 to 0.14; number needed to treat: 14 patients,  $p=0.042$ ). The effect was not confirmed in sequential analysis. No effects of lixisenatide were identified on AST, alkaline phosphatase or bilirubin. No evidence of bias

1  
2  
3  
4  
5  
6  
7  
8  
9  
10  
11  
12  
13  
14  
15  
16  
17  
18  
19  
20  
21  
22  
23  
24  
25  
26  
27  
28  
29  
30  
31  
32  
33  
34  
35  
36  
37  
38  
39  
40  
41  
42  
43  
44  
45  
46  
47  
48  
49  
50  
51  
52  
53  
54  
55  
56  
57  
58  
59  
60

**Effects of the glucagon-like peptide-1 receptor agonist lixisenatide on liver blood tests: systematic review with individual patient data meta-analysis of randomised controlled trials. Gluud et al**

was identified. Mixed effect multilevel meta-regression analyses suggested that the benefit of lixisenatide on ALT was limited to patients who were overweight or obese.

**Conclusion** This review suggests that lixisenatide increases the proportion of obese or overweight patients with type 2 diabetes who achieve normalisation of ALT. Additional research is needed to determine if the findings translate to clinical outcome measures.

1  
2  
3  
4  
5  
6  
7  
8  
9  
10  
11  
12  
13  
14  
15  
16  
17  
18  
19  
20  
21  
22  
23  
24  
25  
26  
27  
28  
29  
30  
31  
32  
33  
34  
35  
36  
37  
38  
39  
40  
41  
42  
43  
44  
45  
46  
47  
48  
49  
50  
51  
52  
53  
54  
55  
56  
57  
58  
59  
60

## Effects of the glucagon-like peptide-1 receptor agonist lixisenatide on liver blood tests: systematic review with individual patient data meta-analysis of randomised controlled trials. Gluud et al

### Strengths and limitations of this study

- This systematic review of randomised controlled trials evaluates if lixisenatide has a beneficial effect of liver blood tests associated with non-alcoholic fatty liver disease (NAFLD) and nonalcoholic steatohepatitis (NASH).
- Based on analyses of individual patient data, lixisenatide increases the proportion of patients with normalisation of alanine aminotransferase (ALT) compared with placebo or active comparators. In subgroup analyses, the effect was verified for patients who were obese or overweight, but not for normal weight patients.
- The analyses include data from published and unpublished trials with intention-to-treat analyses of all patients included irrespective of compliance or follow up. The bias control was classed as adequate in all trials based on four or five of the five components included in the Cochrane bias assessment tool.
- Although ALT is the most sensitive biochemical marker of NAFLD and NASH, important effects may be overlooked because patients with severe liver disease were excluded from the trials.
- The available data did not allow for assessment of clinical outcome measures such as development of cirrhosis or hepatocellular carcinoma.

1  
2  
3  
4  
5  
6  
7  
8  
9  
10  
11  
12  
13  
14  
15  
16  
17  
18  
19  
20  
21  
22  
23  
24  
25  
26  
27  
28  
29  
30  
31  
32

## Effects of the glucagon-like peptide-1 receptor agonist lixisenatide on liver blood tests: systematic review with individual patient data meta-analysis of randomised controlled trials. Gluud et al

### What we already know

Patients with type 2 diabetes (especially those who are overweight) have a high risk of developing non-alcoholic fatty liver disease (NAFLD). Alanine aminotransferase (ALT) is associated with NAFLD, especially in the early stages. Interventions that improve glycaemic control may have beneficial effects on NAFLD in type 2 diabetes. The glucagon-like peptide-1 receptor agonist lixisenatide improves glycaemic control in type 2 diabetes.

### What this study adds

Lixisenatide increases the proportion of patients with normalisation of ALT compared with placebo or active comparators.

The effect of lixisenatide on normalisation of ALT was confirmed in subgroup analyses on patients who were obese or overweight, but not for patients with a normal weight.

No beneficial or detrimental effects of lixisenatide on aspartate aminotransferase, alkaline phosphatase or bilirubin were identified.



1  
2  
3  
4  
5  
6  
7  
8  
9  
10  
11  
12  
13  
14  
15  
16  
17  
18  
19  
20  
21  
22  
23  
24  
25  
26  
27  
28  
29  
30  
31  
32  
33  
34  
35  
36  
37  
38  
39  
40  
41  
42  
43  
44  
45  
46  
47  
48  
49  
50  
51  
52  
53  
54  
55  
56  
57  
58  
59  
60

## Effects of the glucagon-like peptide-1 receptor agonist lixisenatide on liver blood tests: systematic review with individual patient data meta-analysis of randomised controlled trials. Gluud et al

### Introduction

The incidence of non-alcoholic fatty liver disease (NAFLD) is increasing and the costs are considerable.[1-3] About ten per cent of patients with NAFLD develop nonalcoholic steatohepatitis (NASH), which may progress to cirrhosis and hepatocellular carcinoma. Obesity and decreased insulin sensitivity are associated with NAFLD and NASH, which common in patients with type 2 diabetes.[4-6] NAFLD is generally an asymptomatic disease. Elevated transaminases are independent predictors of NAFLD although the sensitivity is low.[7] A large proportion of patients with type 2 diabetes and elevated transaminases have NAFLD or NASH. A systematic review on observational studies found that routinely available biochemical markers may be used in the assessment of NAFLD.[8] Elevation of alanine aminotransferase (ALT) is more common than aspartate aminotransferase (AST).[9] The gold standard for the assessment of patients with NAFLD is to perform a liver biopsy, but the procedure is associated with risks and potential sampling error. Biopsy-related complications including bleeding still occur in ultrasonically guided techniques.[10 11]

Treatment of NAFLD and NASH is important. Anti-diabetic interventions have been assessed as a potential treatment option. A systematic review from 2007 found three randomised controlled trials (RCTs) on metformin and pioglitazone in patients with NAFLD or NASH.[12] The review found that the interventions increased the proportion of patients with normalisation of ALT. A subsequent health technology assessment on insulin sensitizers for NAFLD reached a similar conclusion.[13] However, pioglitazone is associated with a considerable risk of serious adverse events including cardiovascular disease and bladder cancer.[14 15] Alternative treatment options are therefore needed.

## Effects of the glucagon-like peptide-1 receptor agonist lixisenatide on liver blood tests: systematic review with individual patient data meta-analysis of randomised controlled trials. Gluud et al

Recent studies suggest that glucagon-like peptide-1 receptor agonists (GLP-1RA) improve insulin sensitivity and resistance - most likely via their body weight-lowering effect.[16] In addition, GLP-1RAs may have a direct effect on hepatocytes reducing hepatic steatosis via glucagon-like peptide-1 receptors in the liver.[17] A review on the GLP1-RA liraglutide and exenatide found that the interventions reduce ALT and AST in patients with type 2 diabetes or obesity.[18] Unfortunately, analyses of patients with elevated liver blood tests were not available. Lixisenatide is a GLP-1RA that improves glycaemic control and reduces body weight in patients with type 2 diabetes.[19 20] There are no RCTs on lixisenatide for patients with NAFLD. However, several trials on lixisenatide included patients who were overweight and allowed inclusion of patients with mildly elevated liver blood tests. The trials were therefore likely to include a relatively large proportion of patients with NAFLD. We therefore conducted a systematic review with outcomes recalculated based on individual patient data from RCTs to determine the effect of lixisenatide on elevated liver blood tests in patients with type 2 diabetes.

### Methods

This review is based on a registered protocol (CRD42013005779). The review methods follow the recommendations described in the Cochrane Handbook for Reviews on Interventions ([www.cochrane.org](http://www.cochrane.org)). The main objective was to compare the effect of lixisenatide versus placebo or other active interventions on normalisation of liver transaminases. RCTs were included irrespective of blinding, language or publication status. Adult patients with type 2 and elevated liver blood tests were included irrespective of gender or body weight.

1  
2  
3  
4  
5  
6  
7  
8  
9  
10  
11  
12  
13  
14  
15  
16  
17  
18  
19  
20  
21  
22  
23  
24  
25  
26  
27  
28  
29  
30  
31  
32  
33  
34  
35  
36  
37  
38  
39  
40  
41  
42  
43  
44  
45  
46  
47  
48  
49  
50  
51  
52  
53  
54  
55  
56  
57  
58  
59  
60

## Effects of the glucagon-like peptide-1 receptor agonist lixisenatide on liver blood tests: systematic review with individual patient data meta-analysis of randomised controlled trials. Gluud et al

Based on previous evidence,[9] the primary outcome measures were normalisation of ALT and AST. Secondary outcome measures included normalisation of alkaline phosphatase and bilirubin as well as a normalisation of the composite outcome measure combining all liver blood tests. The pharmaceutical company producing lixisenatide (Sanofi-Aventis) provided data and additional information on the design of included trials. All outcomes were recalculated based on individual patient data.

All authors participated in the identification and selection of trials. Excluded trials were listed with the reason for exclusion. Eligible trials were identified through electronic and manual searches. Electronic searches were performed without language restrictions in MEDLINE (1946-Feb 2014), Cochrane Library (Issue 2, 2014), Embase (1974 to Feb 2014) and Web of science (1900-Feb 2014). The search strategy in the Cochrane library was lixisenatide, ti,ab,kw (Word variations have been searched) in the Cochrane Library. In Medline, the search strategy was (lixisenatide AND ("randomized controlled trial"[Publication Type]) OR ("controlled clinical trial"[Publication Type])). Additional manual searches were performed in reference lists of relevant papers, correspondence with experts, the pharmaceutical company producing lixisenatide and the World Health Organisation Trial Search Database (<http://apps.who.int/trialsearch/>).

Two authors extracted data in an independent manner (LG and TV). Disagreements were resolved through discussion. The bias risk assessment was based on the Cochrane Collaboration Risk of Bias Assessment tool ([www.cochrane.org](http://www.cochrane.org)). The assessment included the separate domains random sequence generation, allocation concealment, blinding of participants and personnel, blinding of outcome assessment, incomplete

1  
2  
3  
4  
5  
6  
7  
8  
9  
10  
11  
12  
13  
14  
15  
16  
17  
18  
19  
20  
21  
22  
23  
24

**Effects of the glucagon-like peptide-1 receptor agonist lixisenatide on liver blood tests: systematic review with individual patient data meta-analysis of randomised controlled trials. Gluud et al**

outcome data, selective bias and other biases. Each domain was classed as having a high, uncertain or low risk of bias.

25  
26  
27  
28  
29  
30  
31  
32  
33  
34  
35  
36  
37  
38  
39  
40  
41  
42  
43  
44  
45  
46  
47  
48

**Random sequence generation:** Low risk' of bias: The investigators describe a random component in the sequence generation process such as: referring to a random number table or using a computer random number generator. Unclear risk of bias: Insufficient information about the sequence generation process to permit judgment of 'low risk' or 'high risk'. High risk of bias: The investigators describe a non-random component in the sequence generation process.

49  
50  
51  
52  
53  
54  
55  
56  
57  
58  
59  
60

**Allocation concealment:** Low risk of bias: Participants and investigators enrolling participants could not foresee assignment because one of the following, or an equivalent method, was used to conceal allocation: Central allocation (including telephone, web-based and pharmacy-controlled). Unclear risk of bias: Insufficient information to permit judgement of 'low risk' or 'high risk'. High risk of bias: Participants or investigators enrolling participants could possibly foresee assignments.

**Blinding of participants and personnel:** Low risk of bias: No blinding or incomplete blinding, but the outcome is not likely to be influenced by lack of blinding (e.g., objective outcome measures such as blood tests). Unclear risk of bias: Insufficient information to permit judgement of 'low risk' or 'high risk'. High risk of bias: No blinding or incomplete blinding, and the outcome is likely to be influenced by lack of blinding.

**Blinding of outcome assessment:** Low risk of bias: No blinding of outcome assessment, but the outcome measurement is not likely to be influenced by lack of blinding (e.g., blood tests). Unclear risk of bias: Insufficient information to permit judgement of 'low risk' or 'high

1  
2  
3  
4  
5  
6  
7  
8  
9  
10  
11  
12  
13  
14  
15  
16  
17  
18  
19  
20  
21  
22  
23  
24  
25  
26  
27  
28  
29  
30  
31  
32  
33  
34  
35  
36  
37  
38  
39  
40  
41  
42  
43  
44  
45  
46  
47  
48  
49  
50  
51  
52  
53  
54  
55  
56  
57  
58  
59  
60

**Effects of the glucagon-like peptide-1 receptor agonist lixisenatide on liver blood tests: systematic review with individual patient data meta-analysis of randomised controlled trials. Gluud et al**

risk'. High risk of bias: No blinding of outcome assessment and the outcome measurement is likely to be influenced by lack of blinding.

**Incomplete outcome data:** Low risk of bias: No missing outcome data; reasons for missing outcome data unlikely to be related to true outcome. Missing outcome data balanced in numbers across intervention groups, with similar reasons for missing data across groups, The proportion of missing outcomes compared with observed event risk not enough to have a clinically relevant impact on the intervention effect estimate; missing data have been imputed using appropriate methods. Unclear risk of bias: Insufficient information to permit judgement of 'low risk' or 'high risk'. High risk of bias: Reason for missing outcome data likely to be related to true outcome; the proportion of missing outcomes compared with observed event risk enough to induce clinically relevant bias in intervention effect estimate; 'as-treated' analysis done with substantial departure of the assigned intervention; potentially inappropriate application of simple imputation.

**Selective reporting:** Low risk of bias: The study protocol is available and all of the study's pre-specified outcomes (primary and secondary) that are of interest in the review have been reported in the pre-specified way; The study protocol is not available, but it is clear that the published reports include all expected outcomes, including those that were pre-specified (convincing text of this nature may be uncommon). Unclear risk of bias: Insufficient information to permit judgement of 'low risk' or 'high risk'. High risk of bias: Not all of the study's pre-specified primary outcomes have been reported; one or more primary outcomes is reported using measurements, analysis methods or subsets of the data that were not pre-specified; one or more reported primary outcomes were not pre-specified (unless clear justification for their reporting is provided, such as an unexpected adverse

1  
2  
3  
4  
5  
6  
7  
8  
9  
10  
11  
12  
13  
14  
15  
16  
17  
18  
19  
20  
21  
22  
23  
24

## Effects of the glucagon-like peptide-1 receptor agonist lixisenatide on liver blood tests: systematic review with individual patient data meta-analysis of randomised controlled trials. Gluud et al

effect); one or more outcomes of interest in the review are reported incompletely so that they cannot be entered in a meta-analysis; the study report fails to include results for a key outcome that would be expected to have been reported for such a study.

**Other bias:** Low risk: The study appears to be free of other sources of bias. Unclear risk of bias: Insufficient information to assess whether an important risk of bias exists. High risk: The study had a potential source of bias related to the specific study design used, or has been claimed to have been fraudulent, or had some other problem.

### Statistical analysis

25  
26  
27  
28  
29  
30  
31  
32  
33  
34  
35  
36  
37  
38  
39  
40  
41  
42  
43  
44  
45  
46  
47  
48  
49  
50  
51  
52  
53  
54  
55  
56  
57  
58  
59  
60

The analyses were performed in Stata version 13 (STATA Corp, Texas, USA). Random effects meta-analyses were performed due to an expected between study heterogeneity. The results were expressed as risk differences with 95% confidence intervals (CI) and p values and  $I^2$  as a measure of heterogeneity and with the number needed to treat for statistically significant outcome measures. We defined  $I^2$  values below 30% as unimportant, 30-50% as moderate heterogeneity, 50-75% as substantial heterogeneity and >75% as considerable heterogeneity. All patients were included in the analysis irrespective of compliance or follow-up and with imputation of outcomes for patients with missing outcome data (intention to treat). Mixed effect multilevel meta-regression and subgroup analyses were performed to evaluate heterogeneity. The meta-regression analysis evaluated the influence of the metabolic regulation ( $HbA_{1c} \leq 8.5\%$  (69 mmol/mol)), duration of diabetes ( $\geq 5$  years), and body mass index (BMI) (normal weight  $\leq 25$  kg/m<sup>2</sup>, overweight  $>25$  kg/m<sup>2</sup> or obese  $>30$  kg/m<sup>2</sup>). Post hoc analyses were performed to evaluate the effect of the change in bodyweight and ALT. The subgroup analyses evaluated the influence of publication status (full paper articles compared with abstracts and unpublished trials),

1  
2  
3  
4  
5  
6  
7  
8  
9  
10  
11  
12  
13  
14  
15  
16  
17  
18  
19  
20  
21  
22  
23  
24  
25

## Effects of the glucagon-like peptide-1 receptor agonist lixisenatide on liver blood tests: systematic review with individual patient data meta-analysis of randomised controlled trials. Gluud et al

control groups and collateral interventions. Since all trials had a low risk of bias, we did not perform subgroup analyses on bias control. Publication bias and other small study effects were estimated in regression analyses (Harbord's test) and funnel plots. We performed sequential analyses to evaluate the robustness of results from meta-analyses with a statistically significant result. The analysis was performed with alpha 5%, power 80%, model-based diversity correction 12%, relative risk reduction 8% and control group incidence rate 51%.

### Results

26  
27  
28  
29  
30  
31  
32  
33  
34  
35  
36  
37  
38  
39

The initial searches identified 531 potentially eligible records (figure 1). After reading the titles and abstracts, duplicates and records that clearly did not describe RCTs on lixisenatide were excluded. One ongoing trial was excluded because data were not yet available. The remaining records referred to 15 multicentre RCTs that were included in the qualitative and quantitative analyses (table 1). Eleven trials were published as full paper articles,[21-31] three were published as abstracts[32-34] and one was unpublished.

40  
41  
42  
43  
44  
45  
46  
47  
48  
49  
50  
51  
52  
53  
54  
55  
56  
57  
58  
59  
60

The trials included patients with type 2 diabetes diagnosed based on glycated haemoglobin or fasting glucose with inadequate metabolic control on current intervention regimens. The exclusion criteria varied, but overall, none of the trials included patients with an ongoing drug or alcohol abuse, or patients with pancreatitis, gastric surgery, inflammatory bowel disease or other severe systemic illnesses such as alcoholic liver disease. All trials were designed to evaluate the effect of lixisenatide on metabolic regulation.

**Effects of the glucagon-like peptide-1 receptor agonist lixisenatide on liver blood tests: systematic review with individual patient data meta-analysis of randomised controlled trials. Gluud et al**

None of the included trials found statistically significant differences between patient characteristics in the lixisenatide and control groups. The proportion of men was 50% and the mean age in the lixisenatide and control group ranged from 43 to 61 years (table 2). For the lixisenatide group, mean BMI ranged from 25.1 to 36.8 kg/m<sup>2</sup> and the mean HbA<sub>1c</sub> from 7.2 to 8.5% (53 to 69 mmol/mol). For the control group, the mean BMI ranged from 25.2 to 36.8 kg/m<sup>2</sup> and the HbA<sub>1c</sub> 7.4 to 8.9% (56 to 74 mmol/mol). Table 3 shows the mean baseline liver blood tests in the lixisenatide and control groups. The proportion of patients with elevated ALT ranged from 20 to 77% for the lixisenatide group and from 19 to 75% for the control groups. All trials randomised patients based on computer-generated random numbers with central randomisation. RCTs with a placebo control group were double blind with blinding of participants and personnel. RCTs with an active control group were open. All outcomes were objective (blood tests). We estimated that the outcomes were not likely to be influenced by lack of blinding and therefore classed all trials as having a low risk of bias in the domains blinding of participants and personnel and blinding of outcome assessment. All patients were accounted for and included in the analyses and all clinically relevant outcomes were defined and reported. No discrepancies were detected between the protocol and reported outcomes. No other biases were detected. We therefore classed all RCTs as having a low risk of bias.

The duration of therapy ranged from 4 to 76 weeks (mean 29 weeks). Two trials (one unpublished)[21] were designed to evaluate dose titration. The dose of lixisenatide was 20 microgram once-daily in the remaining trials. Twelve trials compared lixisenatide versus placebo and three trials compared lixisenatide versus active controls administered once-daily (liraglutide and sitagliptin) or twice daily (exenatide). The collateral interventions



1  
2  
3  
4  
5  
6  
7  
8  
9  
10  
11  
12  
13

**Effects of the glucagon-like peptide-1 receptor agonist lixisenatide on liver blood tests: systematic review with individual patient data meta-analysis of randomised controlled trials. Gluud et al**

(background therapy) were metformin (five trials), metformin and sulphonylurea (four trials), metformin and pioglitazone (one trial), insulin (three trials) or diet (one trial). The collateral interventions were administered equally to the lixisenatide and control groups.

14  
15  
16  
17  
18  
19  
20  
21  
22  
23  
24  
25  
26  
27  
28  
29  
30  
31  
32  
33  
34  
35  
36  
37  
38  
39  
40  
41  
42  
43  
44  
45  
46  
47  
48  
49  
50  
51  
52  
53  
54  
55  
56  
57  
58  
59  
60

In total, 1,070 patients had elevated ALT at baseline (figure 2). Lixisenatide had a beneficial effect on normalisation of ALT (risk difference 0.07; 95% CI 0.01 to 0.14;  $I^2=23\%$ ; number needed to treat 14 patients,  $p=0.042$ ). The sequential analysis confirmed the primary meta-analysis when using the traditional 5% level of statistical significance (figure 3), but not after adjusting for multiple testing (the trial monitoring boundary was not crossed). Mixed effect multilevel meta-regression analyses of double blind trials (figure 4) found no effect of the metabolic regulation, duration of diabetes or BMI on the overall result ( $p>0.05$  for all analyses). There was no difference between patients with a BMI<25 or a BMI $\geq$ 25. When the analyses were repeated for RCTs with an active control group, lixisenatide had a beneficial effect on normalisation of ALT among patients who were obese ( $p=0.01$ ) or overweight ( $p=0.004$ ), but not among normal weight patients ( $p=0.98$ ). Random effects subgroup meta-analyses of RCTs with an active comparator found a beneficial effect of lixisenatide in patients with a BMI $\geq$ 25 (0.07; 0.02 to 0.12;  $p=0.004$ ), but not in patients with a BMI<25 (-0.04; -0.36 to 0.27;  $p=0.28$ ). There was a moderate correlation between change in bodyweight and change in ALT (regression coefficient=0.38). The baseline metabolic regulation and duration of diabetes did not predict the intervention effect. No evidence of small study effects was seen in regression analysis (Harbord's test,  $p=0.26$ ) or funnel plots (figure 5). Subgroup analyses showed no differences between trials stratified by the publication status, control groups or collateral interventions.

1  
2  
3  
4  
5  
6  
7  
8  
9  
10  
11  
12  
13  
14  
15  
16  
17  
18  
19

## Effects of the glucagon-like peptide-1 receptor agonist lixisenatide on liver blood tests: systematic review with individual patient data meta-analysis of randomised controlled trials. Gluud et al

In total, 191 of 303 (37%) patients randomised to lixisenatide and 128 of 216 (41%) controls achieved normalisation of AST after treatment (figure 5). Random effects meta-analysis found no effect of lixisenatide on AST (0.06; -0.04 to 0.17), alkaline phosphatase (-0.10; -0.23 to 0.03), bilirubin (-0.12, -0.30 to 0.07) or normalisation of all liver blood tests (0.01, -0.01 to 0.03). No differences between subgroups were identified.

## Discussion

20  
21  
22  
23  
24  
25  
26  
27  
28  
29  
30  
31  
32  
33  
34  
35  
36  
37  
38  
39  
40  
41  
42  
43  
44  
45  
46  
47  
48  
49

This systematic review evaluated the effects of lixisenatide on elevated transaminases among patients with type 2 diabetes and a high risk of NAFLD. Analyses of outcome measures recalculated based on individual patient data showed that lixisenatide increased the proportion of patients who achieved normal ALT levels compared with placebo or other glucose lowering agents. The number needed to treat was 14 patients suggesting that the size of the potential benefit is clinically relevant. Our subgroup analyses suggested that lixisenatide was more effective in obese patients. We also found that lixisenatide was more effective than other active controls, which included liraglutide, sitagliptin and exenatide. However, the number of patients in the subgroup analyses was small and the findings therefore uncertain. Furthermore, ALT is used in the diagnostic evaluations and follow-up of patients with NAFLD and NASH in clinical practice, but previous evidence suggests that the sensitivity is low. The low sensitivity suggests that we may overlook intervention benefits. Additional information about outcomes such as histological changes is needed.

50  
51  
52  
53  
54  
55  
56  
57  
58  
59  
60

Individual patient data meta-analyses are based on the original research data instead of data extracted from published reports. The benefits of this approach include a reduced risk of errors as well as the ability to perform the relevant subgroup and sensitivity analyses.

1  
2  
3  
4  
5  
6  
7  
8  
9  
10  
11  
12  
13  
14  
15  
16  
17  
18  
19  
20  
21  
22  
23  
24  
25  
26  
27  
28  
29  
30  
31  
32  
33  
34  
35  
36  
37  
38  
39  
40  
41  
42

**Effects of the glucagon-like peptide-1 receptor agonist lixisenatide on liver blood tests: systematic review with individual patient data meta-analysis of randomised controlled trials. Gluud et al**

The quality of such analyses is high and individual patient data meta-analyses are considered as a 'gold standard' of systematic reviews.[35 36] The main limitation of our review is related to the number of events and patients. As demonstrated in our sequential analyses, the available evidence cannot support or refute clinically relevant intervention effects. None the included trials were specifically designed to evaluate the effect of lixisenatide on patients with NAFLD or NASH. However, one of the specific strengths of the meta-analytic approach is that it allows an assessment of questions not posed by the individual studies. In general, analyses of specific subgroups may be difficult in systematic reviews of RCT that are based on published data. By contrast, such subsets of participants can be analysed when individual patient data are collected.[37] Lixisenatide only appeared to have an effect on ALT, which is the most sensitive biochemical marker of NAFLD. The objective nature of the outcome measure strengthens the validity of our findings. Theoretically, our analyses would have been more sensitive if we had analysed the change in ALT as a continuous outcome. However, there is no clear evidence between quantitative changes in ALT and intervention effects. We found no beneficial or detrimental effects when analysing the remaining liver blood tests.

43  
44  
45  
46  
47  
48  
49  
50  
51  
52  
53  
54  
55  
56  
57  
58  
59  
60

Incretin-based therapies such as lixisenatide and other GLP-1RAs are an important part of the pharmacological treatment of patients with type 2 diabetes. Experimental studies suggest that activation of GLP-1 receptors may prevent diabetes-related comorbidity including obesity and NASH[38] and that GLP-1RAs may improve hepatic steatosis.[39] The beneficial effects of GLP-1RA include improved glycaemic control as well as beneficial effects on bodyweight, blood pressure, cholesterol and cardiovascular biomarkers. Lixisenatide is a once-daily GLP-1RA. The included RCTs found beneficial effects of

**Effects of the glucagon-like peptide-1 receptor agonist lixisenatide on liver blood tests: systematic review with individual patient data meta-analysis of randomised controlled trials. Gluud et al**

lixisenatide used as monotherapy or in combination with metformin, sulphonylureas, thiazolidinediones or basal insulin glargine. The improved glycaemic control was mainly demonstrated in RCTs with a placebo control. Conversely, we found that the benefit of lixisenatide on liver blood tests was more pronounced in RCTs with an active control group. This result suggests that improved metabolic regulation and reductions in body weight may not be the only reason for the potentially beneficial effect on lixisenatide on NAFLD. Some experimental studies suggest that hepatocytes have specific GLP-1 receptors.[17 40] The findings are controversial. In theory, different GLP-1RA may vary in their receptor affinity. The differences between the intervention effects in RCTs with an active comparator and placebo-controlled trials could also reflect the proportion of patients who were overweight. However, at present there is no clear evidence to support or refute this theory. Although we found a potential difference between lixisenatide and other GLP-1RA, the number of trials and the number of patients was too small to make any definite conclusions.

It may be argued that the beneficial effect of lixisenatide reflects changes to the daily intake of alcohol due to gastrointestinal adverse effects. However, none of the primary RCTs included patients with an ongoing alcohol abuse or alcoholic liver disease. None of the RCTs collected data on the exact daily intake of alcohol during the trial. We were therefore unable to determine the potential influence of alcohol.

In conclusion, the risk of bias in this systematic review was small supporting the validity of our findings. The use of lixisenatide seems to have beneficial effects on elevated levels of ALT in patients with type 2 diabetes and could possibly have a role in the treatment of patients with type 2 diabetes and NAFLD. We found potential differences between patients

1  
2  
3  
4  
5  
6  
7  
8  
9  
10  
11  
12  
13  
14  
15  
16  
17  
18  
19  
20  
21  
22  
23  
24  
25  
26  
27  
28  
29  
30  
31  
32  
33  
34  
35  
36  
37  
38  
39  
40  
41  
42  
43  
44  
45  
46  
47  
48  
49  
50  
51  
52  
53  
54  
55  
56  
57  
58  
59  
60

**Effects of the glucagon-like peptide-1 receptor agonist lixisenatide on liver blood tests: systematic review with individual patient data meta-analysis of randomised controlled trials. Gluud et al**

who were obese or normal weight and trials with a placebo control or active comparator. However, additional trials are clearly needed to assess our findings. The evidence does not allow definite treatment recommendations.

For peer review only

1  
2  
3  
4  
5  
6  
7  
8  
9  
10  
11  
12  
13  
14  
15  
16  
17  
18  
19  
20  
21  
22  
23  
24  
25  
26  
27  
28  
29  
30  
31  
32  
33  
34  
35  
36  
37  
38  
39  
40  
41  
42  
43  
44  
45  
46  
47  
48  
49  
50  
51  
52  
53  
54  
55  
56  
57  
58  
59  
60

**Effects of the glucagon-like peptide-1 receptor agonist lixisenatide on liver blood tests: systematic review with individual patient data meta-analysis of randomised controlled trials. Gluud et al**

**Acknowledgement** Thank you to Elena Nikolova and Edward Wang from Sanofi-Aventis for their statistical help and for retrieving data from included trials

**Contributorship statement**

LG wrote the initial draft for the paper, extracted data and performed the statistical analyses. TV extracted data. LG, TV and FK participated in the selection of trials and revised the paper for important intellectual comments.

**Competing interests**

None of the authors have competing interests specifically related to the present work. L.L. Gluud has participated as an investigator in a trial funded by MSD.F.K. Knop has received research funding from Sanofi-Aventis and lecture fees from AstraZeneca, Boehringer Ingelheim Pharmaceuticals, Bristol-Myers Squibb, Eli Lilly and Company, Gilead Sciences, Merck Sharp & Dohme, Novo Nordisk, Ono Pharmaceuticals, Sanofi-Aventis, and Zealand Pharma, is part of the Advisory Boards of Eli Lilly, Bristol-Myers Squibb/AstraZeneca, Novo Nordisk and Zealand Pharma, and has consulted for AstraZeneca, Gilead Sciences, Ono Pharmaceuticals, Novo Nordisk, Sanofi-Aventis and Zealand Pharma. T. Vilsbøll has received fees for being part of an advisory board from AstraZeneca, Boehringer Ingelheim Pharmaceuticals, Bristol-Myers Squibb, Eli Lilly and Company, GI Dynamics, Merck Sharp & Dohme, Novo Nordisk, Sanofi-Aventis and Takeda, and received fees for speaking from AstraZeneca, Boehringer Ingelheim Pharmaceuticals, Bristol-Myers Squibb, Eli Lilly and Company, Merck Sharp & Dohme, Novo Nordisk, Novartis, Sanofi-Aventis, Takeda and Zealand Pharma, and received research support from Novo Nordisk.

1  
2  
3  
4  
5  
6  
7  
8  
9  
10  
11  
12  
13  
14  
15  
16  
17  
18  
19  
20  
21  
22  
23  
24  
25  
26  
27  
28  
29  
30  
31  
32  
33  
34  
35  
36  
37  
38  
39  
40  
41  
42  
43  
44  
45  
46  
47  
48  
49  
50  
51  
52  
53  
54  
55  
56  
57  
58  
59  
60

**Effects of the glucagon-like peptide-1 receptor agonist lixisenatide on liver blood tests: systematic review with individual patient data meta-analysis of randomised controlled trials. Gluud et al**

**Funding**

This research received no specific grant from any funding agency in the public, commercial or not-for-profit sectors. Data were received from Sanofi-Aventis. The paper was sent to Sanofi-Aventis before submission, but the writing, interpretation of data and conclusions were the sole responsibility of the authors who also made the final decision to submit the paper for publication.

**Data sharing**

Extra data is available by emailing LL Gluud (liselottegluud@yahoo.dk)

1  
2  
3  
4  
5  
6  
7  
8  
9  
10  
11  
12  
13  
14  
15  
16  
17  
18  
19  
20  
21  
22  
23  
24  
25  
26  
27  
28  
29  
30  
31  
32  
33  
34  
35  
36  
37  
38  
39  
40  
41  
42  
43  
44  
45  
46  
47  
48  
49  
50  
51  
52  
53  
54  
55  
56  
57  
58  
59  
60

**Effects of the glucagon-like peptide-1 receptor agonist lixisenatide on liver blood tests: systematic review with individual patient data meta-analysis of randomised controlled trials. Gluud et al**

**REFERENCES**

1. Verbeek J, Cassiman D, Lannoo M, et al. Treatment of non-alcoholic fatty liver disease: can we already face the epidemic? *Acta Gastroenterol Belg* 2013;**76**(2):200-9.
2. Parkash O, Hamid S. Are we ready for a new epidemic of under recognized liver disease in South Asia especially in Pakistan? *Non alcoholic fatty liver disease. J Pak Med Assoc* 2013;**63**(1):95-9.
3. Blachier M, Leleu H, Peck-Radosavljevic M, et al. The burden of liver disease in Europe: a review of available epidemiological data. *Journal of hepatology* 2013;**58**(3):593-608.
4. Szczepaniak LS, Nurenberg P, Leonard D, et al. Magnetic resonance spectroscopy to measure hepatic triglyceride content: prevalence of hepatic steatosis in the general population. *American journal of physiology. Endocrinology and metabolism* 2005;**288**(2):E462-8.
5. Bedogni G, Miglioli L, Masutti F, et al. Prevalence of and risk factors for nonalcoholic fatty liver disease: the Dionysos nutrition and liver study. *Hepatology* 2005;**42**(1):44-52.
6. Targher G, Bertolini L, Padovani R, et al. Prevalence of nonalcoholic fatty liver disease and its association with cardiovascular disease among type 2 diabetic patients. *Diabetes Care* 2007;**30**(5):1212-8.
7. Estep JM, Birerdinc A, Younossi Z. Non-invasive diagnostic tests for non-alcoholic fatty liver disease. *Curr Mol Med* 2010;**10**(2):166-72.
8. Miller MH, Ferguson MA, Dillon JF. Systematic review of performance of non-invasive biomarkers in the evaluation of non-alcoholic fatty liver disease. *Liver Int* 2011;**31**(4):461-73.
9. Barsic N, Lerotic I, Smircic-Duvnjak L, et al. Overview and developments in noninvasive diagnosis of nonalcoholic fatty liver disease. *World J Gastroenterol* 2012;**18**(30):3945-54.
10. Terjung B, Lemnitzer I, Dumoulin FL, et al. Bleeding complications after percutaneous liver biopsy. An analysis of risk factors. *Digestion* 2003;**67**(3):138-45.
11. Copel L, Sosna J, Kruskal JB, et al. Ultrasound-guided percutaneous liver biopsy: indications, risks, and technique. *Surg Technol Int* 2003;**11**:154-60.
12. Angelico F, Burattin M, Alessandri C, et al. Drugs improving insulin resistance for non-alcoholic fatty liver disease and/or non-alcoholic steatohepatitis. *Cochrane Database Syst Rev* 2007(1):CD005166.
13. Shyangdan D, Clar C, Ghouri N, et al. Insulin sensitisers in the treatment of non-alcoholic fatty liver disease: a systematic review. *Health Technol Assess* 2011;**15**(38):1-110.
14. Dormandy J, Bhattacharya M, van Troostenburg de Bruyn AR. Safety and tolerability of pioglitazone in high-risk patients with type 2 diabetes: an overview of data from PROactive. *Drug Saf* 2009;**32**(3):187-202.
15. Lewis JD, Habel L, Quesenberry C, et al. Proteinuria testing among patients with diabetes mellitus is associated with bladder cancer diagnosis: potential for unmeasured confounding in studies of pioglitazone and bladder cancer. *Pharmacoepidemiology and drug safety* 2014;**23**(6):636-45.



**Effects of the glucagon-like peptide-1 receptor agonist lixisenatide on liver blood tests: systematic review with individual patient data meta-analysis of randomised controlled trials. Gluud et al**

16. Diaz-Soto G, de Luis DA, Conde-Vicente R, et al. Beneficial effects of liraglutide on adipocytokines, insulin sensitivity parameters and cardiovascular risk biomarkers in patients with Type 2 diabetes: a prospective study. *Diabetes research and clinical practice* 2014;**104**(1):92-6.
17. Gupta NA, Mells J, Dunham RM, et al. Glucagon-like peptide-1 receptor is present on human hepatocytes and has a direct role in decreasing hepatic steatosis in vitro by modulating elements of the insulin signaling pathway. *Hepatology* 2010;**51**(5):1584-92.
18. Vilsboll T, Christensen M, Junker AE, et al. Effects of glucagon-like peptide-1 receptor agonists on weight loss: systematic review and meta-analyses of randomised controlled trials. *BMJ* 2012;**344**:d7771.
19. Scott LJ. Lixisenatide: a review of its use in patients with type 2 diabetes mellitus. *BioDrugs* 2013;**27**(5):509-23.
20. Christensen M, Knop FK, Vilsboll T, et al. Lixisenatide for type 2 diabetes mellitus. *Expert Opin Investig Drugs* 2011;**20**(4):549-57.
21. Lorenz M, Pfeiffer C, Steinstrasser A, et al. Effects of lixisenatide once daily on gastric emptying in type 2 diabetes - Relationship to postprandial glycemia. *Regul Pept* 2013;**185C**:1-8.
22. Ratner RE, Rosenstock J, Boka G. Dose-dependent effects of the once-daily GLP-1 receptor agonist lixisenatide in patients with Type 2 diabetes inadequately controlled with metformin: a randomized, double-blind, placebo-controlled trial. *Diabet Med* 2010;**27**(9):1024-32.
23. Riddle MC, Aronson R, Home P, et al. Adding Once-Daily Lixisenatide for Type 2 Diabetes Inadequately Controlled by Established Basal Insulin A 24-week, randomized, placebo-controlled comparison (GetGoal-L). *Diabetes Care* 2013;**36**(9):2489-96.
24. Riddle MC, Forst T, Aronson R, et al. Adding Once-Daily Lixisenatide for Type 2 Diabetes Inadequately Controlled With Newly Initiated and Continuously Titrated Basal Insulin Glargine A 24-week, randomized, placebo-controlled study (GetGoal-Duo 1). *Diabetes Care* 2013;**36**(9):2497-503.
25. Seino Y, Min KW, Niemoeller E, et al. Randomized, double-blind, placebo-controlled trial of the once-daily GLP-1 receptor agonist lixisenatide in Asian patients with type 2 diabetes insufficiently controlled on basal insulin with or without a sulfonylurea (GetGoal-L-Asia). *Diabetes Obes Metab* 2012;**14**(10):910-7.
26. Ahren B, Dimas AL, Miossec P, et al. Efficacy and Safety of Lixisenatide Once-Daily Morning or Evening Injections in Type 2 Diabetes Inadequately Controlled on Metformin (GetGoal-M). *Diabetes Care* 2013;**36**(9):2543-50.
27. Fonseca VA, Alvarado-Ruiz R, Raccah D, et al. Efficacy and safety of the once-daily GLP-1 receptor agonist lixisenatide in monotherapy: a randomized, double-blind, placebo-controlled trial in patients with type 2 diabetes (GetGoal-Mono). *Diabetes Care* 2012;**35**(6):1225-31.
28. Kapitza C, Forst T, Coester HV, et al. Pharmacodynamic characteristics of lixisenatide once daily versus liraglutide once daily in patients with type 2 diabetes insufficiently controlled on metformin. *Diabetes Obes. Metab.* 2013;**15**(7):642-49.
29. Rosenstock J, Raccah D, Koranyi L, et al. Efficacy and Safety of Lixisenatide Once Daily Versus Exenatide Twice Daily in Type 2 Diabetes Inadequately Controlled on

**Effects of the glucagon-like peptide-1 receptor agonist lixisenatide on liver blood tests: systematic review with individual patient data meta-analysis of randomised controlled trials. Gluud et al**

- Metformin: A 24-Week, Randomized, Open-Label, Active-Controlled Study (GetGoal-X). *Diabetes Care* 2013.
30. Pinget M, Goldenberg R, Niemoeller E, et al. Efficacy and safety of lixisenatide once daily versus placebo in type 2 diabetes insufficiently controlled on pioglitazone (GetGoal-P). *Diabetes Obes Metab* 2013.
31. Bolli GB, Munteanu M, Dotsenko S, et al. Efficacy and safety of lixisenatide once daily vs. placebo in people with Type 2 diabetes insufficiently controlled on metformin (GetGoal-F1). *Diabet Med* 2013.
32. Ratner REH, M.; Shamanna, P.; Min, K.; et al. Efficacy and safety of lixisenatide once daily versus placebo in patients with T2DM insufficiently controlled on sulfonylurea + metformin (GetGoal-S). *Diabetologia* 2011;**54**(11):785.
33. Seino YT, A.; Niemoeller, E.; Sakaki, T.; on behalf of the GetGoal-Mono Study Group. Long-term Safety of Once-daily (QD) Lixisenatide in Japanese Patients with Type 2 Diabetes Mellitus (T2DM): GetGoal-Mono Japan. <http://www.aa-sd.org/> 2012.
34. Pan CYS, S.; Niemoeller, E.; on behalf of the GetGoal-M Asia Study Investigators. Lixisenatide in Asian Patients with Type 2 Diabetes (T2DM) Uncontrolled on Metformin ± Sulfonylurea (SU): GetGoal-M Asia. <http://www.aa-sd.org/> 2012.
35. <http://handbook.cochrane.org/>. Cochrane Handbook for Systematic Reviews of Interventions. Secondary Cochrane Handbook for Systematic Reviews of Interventions.
36. Stewart GB, Altman DG, Askie LM, et al. Statistical analysis of individual participant data meta-analyses: a comparison of methods and recommendations for practice. *PLoS One* 2012;**7**(10):e46042.
37. Deeks JJ, Higgins JP, Altman D, editors. *Chapter 9: Analysing data and undertaking meta-analyses*, 2011.
38. Seino Y, Yabe D. Glucose-dependent insulinotropic polypeptide and glucagon-like peptide-1: Incretin actions beyond the pancreas. *Journal of diabetes investigation* 2013;**4**(2):108-30.
39. Samson SL, Bajaj M. Potential of incretin-based therapies for non-alcoholic fatty liver disease. *Journal of diabetes and its complications* 2013;**27**(4):401-6.
40. Ding X, Saxena NK, Lin S, et al. Exendin-4, a glucagon-like protein-1 (GLP-1) receptor agonist, reverses hepatic steatosis in ob/ob mice. *Hepatology* 2006;**43**(1):173-81.

1  
2  
3  
4  
5  
6  
7  
8  
9  
10  
11  
12  
13  
14  
15  
16  
17  
18  
19  
20  
21  
22  
23  
24  
25  
26  
27  
28  
29  
30  
31  
32  
33  
34  
35  
36  
37  
38  
39  
40  
41  
42  
43  
44  
45  
46  
47  
48  
49  
50  
51  
52  
53  
54  
55  
56  
57  
58  
59  
60

# Effects of the glucagon-like peptide-1 receptor agonist lixisenatide on liver blood tests: systematic review with individual patient data meta-analysis of randomised controlled trials. Gluud et al

## Legends to figures

**Figure 1** Trial flow chart.

**Figure 2** Random effects meta-analysis of randomised controlled trials on normalisation of alanine aminotransferase (ALT). The result of the analysis is expressed as the risk difference (RD) with 95% confidence intervals (CI) and level of significance (p value). The intervention comparisons are lixisenatide versus placebo or active interventions. The included patients have type 2 diabetes and elevated ALT at baseline. The outcome measure is normalisation of ALT.

**Figure 3** Sequential analysis of risk ratios (random effects) in randomised controlled trials on lixisenatide versus placebo or active interventions for patients with type 2 diabetes and elevated alanine aminotransferase (ALT) at baseline. The analysis was performed with alpha 5%, power 80%, model-based diversity correction 12%, relative risk reduction 8% and control group incidence rate 51%. The outcome measure is normalisation of ALT. The analysis shows that lixisenatide has a beneficial effect on normalisation of ALT when assessed using the traditional 5% level of significance (the horizontal line), but not after adjusting for cumulative assessment (the trial monitoring boundary).

**Figure 4** Mixed model meta-regression analysis of the effect of lixisenatide versus placebo on normalisation of alanine aminotransferase (ALT). Included patients have type 2 diabetes and elevated ALT at baseline. The outcome measure is normalisation of ALT. The figure shows the estimated intervention effect (normalisation of ALT) on the log-odds ratio scale in relation to the baseline body weight of included patients from 12 randomised

1  
2  
3  
4  
5  
6  
7  
8  
9  
10  
11  
12  
13  
14  
15  
16  
17  
18  
19  
20  
21  
22  
23  
24  
25  
26  
27  
28  
29  
30  
31  
32  
33  
34  
35  
36  
37  
38  
39  
40  
41  
42  
43  
44  
45  
46  
47  
48  
49  
50  
51  
52  
53  
54  
55  
56  
57  
58  
59  
60

**Effects of the glucagon-like peptide-1 receptor agonist lixisenatide on liver blood tests: systematic review with individual patient data meta-analysis of randomised controlled trials. Gluud et al**

placebo-controlled trials. The size (area) of each circle is inversely proportional to the variance of the log-odds ratio (the larger the circle the less the variance).

**Figure 5** Random effects meta-analysis of randomised controlled trials on normalisation of aspartate aminotransferase (AST). The result of the analysis is expressed as the risk difference (RD) with 95% confidence intervals (CI) and level of significance (p value). The intervention comparisons are lixisenatide versus placebo or active interventions. The included patients have type 2 diabetes and elevated ALT at baseline. The outcome measure is normalisation of ALT.

For peer review only

**Effects of the glucagon-like peptide-1 receptor agonist lixisenatide on liver blood tests: systematic review with individual patient data meta-analysis of randomised controlled trials. Gluud et al**

**Table 1 Characteristics of included trials**

| <b>Trial</b>              | <b>Publication status</b> | <b>Control</b> | <b>Collateral interventions*</b> | <b>Duration (weeks)</b> |
|---------------------------|---------------------------|----------------|----------------------------------|-------------------------|
| Lorenz 2013 ACT6011 QD    | Full paper                | Placebo        | Sulfonylureas ± metformin        | 4                       |
| Ratner 2010 DRI6012 QD    | Full paper                | Placebo        | Metformin                        | 24                      |
| Pan 2012 GetGoal-M-Asia   | Abstract                  | Placebo        | Sulfonylureas ± metformin        | 24                      |
| Riddle 2013 GetGoal-Duo1  | Full paper                | Placebo        | Insulin                          | 24                      |
| Riddle 2013 GetGoal-L     | Full paper                | Placebo        | Insulin                          | 24                      |
| Seino 2012 GetGoal-L-Asia | Full paper                | Placebo        | Insulin                          | 24                      |
| Ahren 2013 GetGoal-M      | Full paper                | Placebo        | Metformin                        | 24                      |
| Fonseca 2012 GetGoal-Mono | Full paper                | Placebo        | Diet                             | 24                      |
| Ratner 2012 GetGoal-S     | Abstract                  | Placebo        | Sulfonylureas ± metformin        | 76                      |
| PDY6797 QD                | Unpublished               | Placebo        | Sulfonylureas ± metformin        | 76                      |
| Rosenstock 2013 GetGoal-X | Full paper                | Exenatide      | Metformin                        | 24                      |
| Kapitza 2013 PDY10931     | Full paper                | Liraglutide    | Metformin                        | 4                       |
| Seino 2012 EFC10780       | Full paper                | Sitagliptin    | Metformin                        | 24                      |
| Pinget 2013 GetGoal-P     | Full paper                | Placebo        | Pioglitazone ± metformin         | 24                      |
| Bolli 2013 GetGoal-F1     | Full paper                | Placebo        | Metformin                        | 24                      |

\*Collateral interventions were administered equally to the lixisenatide and control groups

**Effects of the glucagon-like peptide-1 receptor agonist lixisenatide on liver blood tests: systematic review with individual patient data meta-analysis of randomised controlled trials. Gluud et al**

**Table 2 Characteristics of included patients (mean and standard deviation)**

| Trial                        | Body Mass Index (kg/m <sup>2</sup> ) |      |          |      | Weight (kg)  |       |          |       | Glycated haemoglobin (%) |      |          |      |
|------------------------------|--------------------------------------|------|----------|------|--------------|-------|----------|-------|--------------------------|------|----------|------|
|                              | Lixisenatide                         |      | Controls |      | Lixisenatide |       | Controls |       | Lixisenatide             |      | Controls |      |
|                              | Mean                                 | SD   | Mean     | SD   | Mean         | SD    | Mean     | SD    | Mean                     | SD   | Mean     | SD   |
| Lorenz 2013<br>ACT6011 QD    | 31.38                                | 4.05 | 29.77    | 3.76 | 89.40        | 14.66 | 83.80    | 14.68 | 8.54                     | 1.07 | 8.87     | 1.07 |
| Ratner 2010<br>DRI6012 QD    | 32.01                                | 4.28 | 31.74    | 4.15 | 89.37        | 17.00 | 87.68    | 13.63 | 7.58                     | 0.65 | 7.53     | 0.63 |
| Bolli 2013<br>GetGoal-F1     | 32.53                                | 5.36 | 32.37    | 5.45 | 88.81        | 17.98 | 87.87    | 17.37 | 8.05                     | 0.88 | 8.03     | 0.82 |
| Riddle 2013<br>GetGoal-Duo1  | 31.99                                | 6.63 | 31.65    | 6.01 | 87.31        | 21.76 | 86.75    | 20.41 | 7.56                     | 0.55 | 7.60     | 0.54 |
| Seino 2012<br>GetGoal-L-Asia | 25.36                                | 3.69 | 25.15    | 3.94 | 65.93        | 13.00 | 65.60    | 12.47 | 8.54                     | 0.73 | 8.52     | 0.78 |
| Pan 2012<br>GetGoal-M-Asia   | 26.75                                | 3.86 | 27.08    | 3.75 | 73.18        | 13.93 | 72.74    | 13.64 | 7.95                     | 0.81 | 7.85     | 0.71 |
| Ahren 2013<br>GetGoal-M      | 32.84                                | 6.34 | 33.12    | 6.45 | 89.57        | 20.91 | 90.15    | 20.14 | 8.06                     | 0.89 | 8.06     | 0.90 |
| Ratner 2012<br>GetGoal-S     | 30.13                                | 6.62 | 30.42    | 6.64 | 82.30        | 21.76 | 84.42    | 22.83 | 8.28                     | 0.86 | 8.21     | 0.84 |
| Riddle 2013<br>GetGoal-L     | 31.91                                | 6.17 | 32.56    | 6.32 | 87.10        | 20.01 | 88.94    | 20.84 | 8.42                     | 0.88 | 8.37     | 0.84 |
| Pinget 2013<br>GetGoal-P     | 33.66                                | 6.71 | 34.44    | 7.04 | 92.93        | 22.90 | 96.74    | 25.58 | 8.08                     | 0.90 | 8.06     | 0.79 |

**Effects of the glucagon-like peptide-1 receptor agonist lixisenatide on liver blood tests: systematic review with individual patient data meta-analysis of randomised controlled trials. Gluud et al**

|                 |       |      |       |      |       |       |        |       |      |      |      |      |
|-----------------|-------|------|-------|------|-------|-------|--------|-------|------|------|------|------|
| Fonseca 2012    | 31.99 | 6.66 | 31.76 | 6.69 | 87.77 | 21.58 | 86.08  | 22.21 | 8.03 | 0.89 | 8.07 | 0.91 |
| GetGoal-Mono    |       |      |       |      |       |       |        |       |      |      |      |      |
| PDY6797         | 25.09 | 3.65 | 26.39 | 3.50 | 71.54 | 16.77 | 76.92  | 16.07 | 8.19 | 0.82 | 8.38 | 0.75 |
| Rosenstock 2013 | 33.68 | 6.27 | 33.51 | 6.54 | 94.01 | 19.63 | 96.09  | 22.52 | 7.95 | 0.81 | 7.97 | 0.78 |
| GetGoal-X       |       |      |       |      |       |       |        |       |      |      |      |      |
| Seino 2012      | 36.76 | 7.25 | 36.76 | 6.34 | 98.51 | 23.48 | 100.56 | 23.77 | 8.16 | 0.89 | 8.09 | 0.96 |
| EFC10780        |       |      |       |      |       |       |        |       |      |      |      |      |
| Kapitza 2013    | 31.23 | 3.93 | 31.33 | 4.08 | 91.16 | 15.28 | 92.88  | 16.59 | 7.20 | 0.63 | 7.41 | 0.81 |
| PDY10931        |       |      |       |      |       |       |        |       |      |      |      |      |

**Effects of the glucagon-like peptide-1 receptor agonist lixisenatide on liver blood tests: systematic review with individual patient data meta-analysis of randomised controlled trials. Gluud et al**

**Table 3 Baseline liver blood tests expressed as units/litre (mean and standard deviation, SD)**

| Trial                        | Alanine aminotransferase |       |          |       | Aspartate aminotransferase |       |          |       | Alkaline phosphatase |       |          |       |
|------------------------------|--------------------------|-------|----------|-------|----------------------------|-------|----------|-------|----------------------|-------|----------|-------|
|                              | Lixisenatide             |       | Controls |       | Lixisenatide               |       | Controls |       | Lixisenatide         |       | Controls |       |
|                              | Mean                     | SD    | Mean     | SD    | Mean                       | SD    | Mean     | SD    | Mean                 | SD    | Mean     | SD    |
| Lorenz 2013<br>ACT6011 QD    | 25.48                    | 8.18  | 25.91    | 12.50 | 19.43                      | 4.95  | 19.23    | 4.62  | 83.52                | 27.00 | 83.55    | 19.43 |
| Ratner 2010<br>DRI6012 QD    | 28.31                    | 19.42 | 25.24    | 13.94 | 24.65                      | 15.38 | 23.49    | 11.35 | 73.60                | 28.28 | 75.47    | 41.00 |
| Bolli 2013<br>GetGoal-F1     | 30.69                    | 16.34 | 29.34    | 15.41 | 23.93                      | 10.30 | 23.62    | 10.68 | 72.83                | 21.58 | 74.54    | 21.23 |
| Riddle 2013<br>GetGoal-Duo1  | 23.93                    | 17.09 | 24.71    | 12.90 | 21.16                      | 8.81  | 21.67    | 8.64  | 71.18                | 21.65 | 70.95    | 23.29 |
| Seino 2012<br>GetGoal-L-Asia | 25.19                    | 12.85 | 23.03    | 10.34 | 22.78                      | 7.56  | 21.43    | 7.79  | 71.90                | 17.59 | 71.01    | 20.11 |
| Pan 2012<br>GetGoal-M-Asia   | 31.36                    | 19.32 | 32.82    | 20.69 | 24.13                      | 11.07 | 25.14    | 11.08 | 78.89                | 21.60 | 80.48    | 26.75 |
| Ahren 2013<br>GetGoal-M      | 31.08                    | 16.58 | 33.48    | 46.58 | 24.38                      | 11.74 | 26.12    | 22.07 | 78.88                | 24.24 | 74.65    | 25.15 |
| Ratner 2012<br>GetGoal-S     | 26.93                    | 12.56 | 27.72    | 12.64 | 21.45                      | 7.09  | 21.54    | 7.20  | 73.40                | 21.41 | 72.69    | 22.69 |
| Riddle 2013<br>GetGoal-L     | 26.57                    | 17.61 | 25.92    | 12.57 | 22.88                      | 12.13 | 22.31    | 7.76  | 81.38                | 25.84 | 78.56    | 25.43 |



**Effects of the glucagon-like peptide-1 receptor agonist lixisenatide on liver blood tests: systematic review with individual patient data meta-analysis of randomised controlled trials. Gluud et al**

|                              |       |       |       |       |       |       |       |       |       |       |       |       |
|------------------------------|-------|-------|-------|-------|-------|-------|-------|-------|-------|-------|-------|-------|
| Pinget 2013<br>GetGoal-P     | 24.66 | 12.01 | 24.59 | 10.86 | 21.46 | 8.93  | 21.48 | 8.27  | 75.24 | 29.68 | 73.13 | 22.49 |
| Fonseca 2012<br>GetGoal-Mono | 29.74 | 16.05 | 25.43 | 11.40 | 23.71 | 11.78 | 21.91 | 7.40  | 78.95 | 21.10 | 80.07 | 26.42 |
| PDY6797                      | 23.72 | 11.15 | 27.00 | 14.67 | 23.97 | 15.33 | 23.73 | 9.52  | 61.59 | 14.64 | 70.73 | 18.19 |
| Seino 2012<br>EFC10780       | 35.70 | 20.63 | 39.83 | 23.64 | 25.50 | 13.76 | 28.74 | 20.54 | 81.97 | 25.11 | 83.61 | 28.13 |
| Rosenstock 2013<br>GetGoal-X | 28.50 | 13.06 | 30.65 | 15.83 | 22.17 | 7.92  | 23.28 | 9.27  | 72.43 | 22.13 | 72.15 | 19.86 |
| Kapitza 2013<br>PDY10931     | 33.88 | 16.36 | 34.23 | 16.99 | 27.31 | 13.47 | 26.45 | 9.07  | 67.56 | 16.62 | 67.58 | 20.07 |

1  
2  
3  
4  
5  
6  
7  
8  
9  
10  
11  
12  
13  
14  
15  
16  
17  
18  
19  
20  
21  
22  
23  
24  
25  
26  
27  
28  
29  
30  
31  
32  
33  
34  
35  
36  
37  
38  
39  
40  
41  
42  
43  
44  
45  
46  
47  
48  
49

**Effects of the glucagon-like peptide-1 receptor agonist lixisenatide on liver blood tests: systematic review with individual patient data meta-analysis of randomised controlled trials. Gluud et al**

For peer review only

1  
2  
3  
4 **Effects of lixisenatide on elevated liver transaminases: systematic**  
5 **review with individual patient data meta-analysis of randomised**  
6 **controlled trials on patients with type 2 diabetes**  
7  
8  
9  
10  
11  
12  
13

14 Lise L. Gluud<sup>1,2</sup>, Filip K. Knop<sup>1</sup>, Tina Vilsbøll<sup>1</sup>  
15  
16  
17

18 <sup>1</sup>Diabetes Research Centre, Department of Medicine, Gentofte Hospital, University of  
19 Copenhagen, Denmark  
20  
21

22 <sup>2</sup>Department of Gastroenterology, Hvidovre Hospital, University of Copenhagen, Denmark  
23  
24  
25  
26

27 *L.L. Gluud, Consultant, DMSc*  
28

29 *F.K. Knop, Associate Professor, Specialist Registrar, PhD*  
30

31 *T. Vilsbøll, Professor, Consultant, DMSc*  
32  
33  
34  
35

36 Running Head: Lixisenatide for type 2 diabetes and elevated liver blood tests  
37  
38  
39

40 Correspondence to: L.L. Gluud, Department of Gastroenterology, Copenhagen University  
41 Hospital Hvidovre, Kettegaards Alle 30, DK-2650 Hvidovre, Denmark;  
42  
43  
44  
45  
46  
47  
48  
49  
50  
51  
52  
53  
54  
55  
56  
57  
58  
59  
60  
liselottegluud@yahoo.dk

Key words: Non-alcoholic fatty liver disease, non-alcoholic steatohepatitis, meta-analysis,  
insulin resistance, type 2 diabetes, alanine aminotransferase.

Word count: Abstract: 241; Text: 3324

## What we already know

Patients with type 2 diabetes (especially those who are overweight) have a high risk of developing non-alcoholic fatty liver disease (NAFLD). Alanine aminotransferase (ALT) is associated with NAFLD, especially in the early stages. Interventions that improve glycaemic control may have beneficial effects on NAFLD in type 2 diabetes. The glucagon-like peptide-1 receptor agonist lixisenatide improves glycaemic control in type 2 diabetes.

## What this study adds

Lixisenatide increases the proportion of patients with normalisation of ALT compared with placebo or active comparators.

The effect of lixisenatide on normalisation of ALT was confirmed in subgroup analyses on patients who were obese or overweight, but not for patients with a normal weight.

No beneficial or detrimental effects of lixisenatide on aspartate aminotransferase, alkaline phosphatase or bilirubin were identified.

## Abstract

**Objective** To evaluate the effects of the glucagon-like peptide-1 receptor agonist lixisenatide on elevated liver blood tests in patients with type 2 diabetes.

**Design** Systematic review.

**Data sources** Electronic and manual searches were combined.

**Study selection** Randomised controlled trials (RCTs) on lixisenatide versus placebo or active comparators for type 2 diabetes were included.

**Participants** Individual patient data were retrieved to calculate outcomes for patients with elevated liver blood tests.

**Main outcome measures** Normalisation of alanine aminotransferase (ALT) and aspartate aminotransferase.

**Data Synthesis** The results of included trials were combined in meta-analyses. Sequential, subgroup and regression analyses were performed to evaluate heterogeneity and bias.

**Results** We included 12 RCTs on lixisenatide versus placebo and three RCTs with the active comparators liraglutide, exenatide, or sitagliptin. The mean treatment duration was 29 weeks. Lixisenatide increased the proportion of patients with normalisation of ALT (risk difference: 0.07; 95% confidence interval: 0.01 to 0.14; number needed to treat: 14 patients,  $p=0.042$ ). The effect was not confirmed in sequential analysis. No effects of lixisenatide were identified on AST, alkaline phosphatase or bilirubin. No evidence of bias

1  
2  
3  
4 was identified. Mixed effect multilevel meta-regression analyses suggested that the benefit  
5  
6 of lixisenatide on ALT was limited to patients who were overweight or obese.  
7  
8

9 **Conclusion** This review suggests that lixisenatide increases the proportion of obese or  
10  
11 overweight patients with type 2 diabetes who achieve normalisation of ALT. Additional  
12  
13 research is needed to determine if the findings translate to clinical outcome measures.  
14  
15  
16  
17  
18  
19  
20  
21  
22  
23  
24  
25  
26  
27  
28  
29  
30  
31  
32  
33  
34  
35  
36  
37  
38  
39  
40  
41  
42  
43  
44  
45  
46  
47  
48  
49  
50  
51  
52  
53  
54  
55  
56  
57  
58  
59  
60

## Strengths and limitations of this study

- This systematic review of randomised controlled trials evaluates if lixisenatide has a beneficial effect of liver blood tests associated with non-alcoholic fatty liver disease (NAFLD) and nonalcoholic steatohepatitis (NASH).
- Based on analyses of individual patient data, lixisenatide increases the proportion of patients with normalisation of alanine aminotransferase (ALT) compared with placebo or active comparators. In subgroup analyses, the effect was verified for patients who were obese or overweight, but not for normal weight patients.
- The analyses include data from published and unpublished trials with intention-to-treat analyses of all patients included irrespective of compliance or follow up. The bias control was classed as adequate in all trials based on four or five of the five components included in the Cochrane bias assessment tool.
- Although ALT is the most sensitive biochemical marker of NAFLD and NASH, important effects may be overlooked because patients with severe liver disease were excluded from the trials.
- The available data did not allow for assessment of clinical outcome measures such as development of cirrhosis or hepatocellular carcinoma.

## Introduction

The incidence of non-alcoholic fatty liver disease (NAFLD) is increasing and the costs are considerable.[1-3] About ten per cent of patients with NAFLD develop nonalcoholic steatohepatitis (NASH), which may progress to cirrhosis and hepatocellular carcinoma. Obesity and decreased insulin sensitivity are associated with NAFLD and NASH, which common in patients with type 2 diabetes.[4-6] NAFLD is generally an asymptomatic disease. Elevated transaminases are independent predictors of NAFLD although the sensitivity is low.[7] A large proportion of patients with type 2 diabetes and elevated transaminases have NAFLD or NASH. A systematic review on observational studies found that routinely available biochemical markers may be used in the assessment of NAFLD.[8] Elevation of alanine aminotransferase (ALT) is more common than aspartate aminotransferase (AST).[9] The gold standard for the assessment of patients with NAFLD is to perform a liver biopsy, but the procedure is associated with risks and potential sampling error. Biopsy-related complications including bleeding still occur in ultrasonically guided techniques.[10 11]

Treatment of NAFLD and NASH is important. Anti-diabetic interventions have been assessed as a potential treatment option. A systematic review from 2007 found three randomised controlled trials (RCTs) on metformin and pioglitazone in patients with NAFLD or NASH.[12] The review found that the interventions increased the proportion of patients with normalisation of ALT. A subsequent health technology assessment on insulin sensitizers for NAFLD reached a similar conclusion.[13] However, pioglitazone is associated with a considerable risk of serious adverse events including cardiovascular disease and bladder cancer.[14 15] Alternative treatment options are therefore needed. Recent studies suggest that glucagon-like peptide-1 receptor agonists (GLP-1RA) improve



1  
2  
3  
4 insulin sensitivity and resistance - most likely via their body weight-lowering effect.[16] In  
5  
6 addition, GLP-1RAs may have a direct effect on hepatocytes reducing hepatic steatosis  
7  
8 via glucagon-like peptide-1 receptors in the liver.[17] A review on the GLP1-RA liraglutide  
9  
10 and exenatide found that the interventions reduce ALT and AST in patients with type 2  
11  
12 diabetes or obesity.[18] Unfortunately, analyses of patients with elevated liver blood tests  
13  
14 were not available. Lixisenatide is a GLP-1RA that improves glycaemic control and  
15  
16 reduces body weight in patients with type 2 diabetes.[19 20] There are no RCTs on  
17  
18 lixisenatide for patients with NAFLD. However, several trials on lixisenatide included  
19  
20 patients who were overweight and allowed inclusion of patients with mildly elevated liver  
21  
22 blood tests. The trials were therefore likely to include a relatively large proportion of  
23  
24 patients with NAFLD. We therefore conducted a systematic review with outcomes  
25  
26 recalculated based on individual patient data from RCTs to determine the effect of  
27  
28 lixisenatide on elevated liver blood tests in patients with type 2 diabetes.  
29  
30  
31  
32  
33  
34  
35

## 36 **Methods**

37  
38 This review is based on a registered protocol (CRD42013005779). The review methods  
39  
40 follow the recommendations described in the Cochrane Handbook for Reviews on  
41  
42 Interventions (www.cochrane.org). The main objective was to compare the effect of  
43  
44 lixisenatide versus placebo or other active interventions on normalisation of liver  
45  
46 transaminases. RCTs were included irrespective of blinding, language or publication  
47  
48 status. Adult patients with type 2 and elevated liver blood tests were included irrespective  
49  
50 of gender or body weight.  
51  
52  
53  
54  
55  
56  
57  
58  
59  
60

1  
2  
3  
4 Based on previous evidence,[9] the primary outcome measures were normalisation of ALT  
5 and AST. Secondary outcome measures included normalisation of alkaline phosphatase  
6 and bilirubin as well as a normalisation of the composite outcome measure combining all  
7 liver blood tests. The pharmaceutical company producing lixisenatide (Sanofi-Aventis)  
8 provided data and additional information on the design of included trials. All outcomes  
9 were recalculated based on individual patient data.  
10  
11  
12  
13  
14  
15  
16

17  
18 All authors participated in the identification and selection of trials. Excluded trials were  
19 listed with the reason for exclusion. Eligible trials were identified through electronic and  
20 manual searches. Electronic searches were performed **without language restrictions** in  
21 MEDLINE (1946-Feb 2014), Cochrane Library (Issue 2, 2014), Embase (1974 to Feb  
22 2014) and Web of science (1900-Feb 2014). The search strategy in the Cochrane library  
23 was lixisenatide, ti,ab,kw (Word variations have been searched) in the Cochrane Library.  
24 In Medline, the search strategy was (lixisenatide AND ("randomized controlled  
25 trial"[Publication Type]) OR ("controlled clinical trial"[Publication Type])). Additional manual  
26 searches were performed in reference lists of relevant papers, correspondence with  
27 experts, the pharmaceutical company producing lixisenatide and the World Health  
28 Organisation Trial Search Database (<http://apps.who.int/trialsearch/>).  
29  
30  
31  
32  
33  
34  
35  
36  
37  
38  
39  
40  
41  
42

43 Two authors extracted data in an independent manner (LG and TV). Disagreements were  
44 resolved through discussion. The bias risk assessment was based on the Cochrane  
45 Collaboration Risk of Bias Assessment tool ([www.cochrane.org](http://www.cochrane.org)). The assessment  
46 included the separate domains random sequence generation, allocation concealment,  
47 blinding of participants and personnel, blinding of outcome assessment, incomplete  
48 outcome data, selective bias and other biases. Each domain was classed as having a  
49 high, uncertain or low risk of bias.  
50  
51  
52  
53  
54  
55  
56  
57  
58  
59  
60

1  
2  
3  
4 **Random sequence generation:** Low risk' of bias: The investigators describe a random  
5 component in the sequence generation process such as: referring to a random number  
6 table or using a computer random number generator. Unclear risk of bias: Insufficient  
7 information about the sequence generation process to permit judgment of 'low risk' or 'high  
8 risk'. High risk of bias: The investigators describe a non-random component in the  
9 sequence generation process.  
10

11  
12  
13 **Allocation concealment:** Low risk of bias: Participants and investigators enrolling  
14 participants could not foresee assignment because one of the following, or an equivalent  
15 method, was used to conceal allocation: Central allocation (including telephone, web-  
16 based and pharmacy-controlled). Unclear risk of bias: Insufficient information to permit  
17 judgement of 'low risk' or 'high risk'. High risk of bias: Participants or investigators enrolling  
18 participants could possibly foresee assignments.  
19

20  
21  
22 **Blinding of participants and personnel:** Low risk of bias: No blinding or incomplete  
23 blinding, but the outcome is not likely to be influenced by lack of blinding (e.g., objective  
24 outcome measures such as blood tests). Unclear risk of bias: Insufficient information to  
25 permit judgement of 'low risk' or 'high risk'. High risk of bias: No blinding or incomplete  
26 blinding, and the outcome is likely to be influenced by lack of blinding.  
27

28  
29  
30 **Blinding of outcome assessment:** Low risk of bias: No blinding of outcome assessment,  
31 but the outcome measurement is not likely to be influenced by lack of blinding (e.g., blood  
32 tests). Unclear risk of bias: Insufficient information to permit judgement of 'low risk' or 'high  
33 risk'. High risk of bias: No blinding of outcome assessment and the outcome measurement  
34 is likely to be influenced by lack of blinding.  
35

36  
37  
38 **Incomplete outcome data:** Low risk of bias: No missing outcome data; reasons for  
39 missing outcome data unlikely to be related to true outcome. Missing outcome data  
40  
41  
42  
43  
44  
45  
46  
47  
48  
49  
50  
51  
52  
53  
54  
55  
56  
57  
58  
59  
60

1  
2  
3  
4 balanced in numbers across intervention groups, with similar reasons for missing data  
5  
6 across groups, The proportion of missing outcomes compared with observed event risk not  
7  
8 enough to have a clinically relevant impact on the intervention effect estimate; missing  
9  
10 data have been imputed using appropriate methods. Unclear risk of bias: Insufficient  
11  
12 information to permit judgement of 'low risk' or 'high risk'. High risk of bias: Reason for  
13  
14 missing outcome data likely to be related to true outcome; the proportion of missing  
15  
16 outcomes compared with observed event risk enough to induce clinically relevant bias in  
17  
18 intervention effect estimate; 'as-treated' analysis done with substantial departure of the  
19  
20 assigned intervention; potentially inappropriate application of simple imputation.  
21  
22

23  
24 **Selective reporting:** Low risk of bias: The study protocol is available and all of the study's  
25  
26 pre-specified outcomes (primary and secondary) that are of interest in the review have  
27  
28 been reported in the pre-specified way; The study protocol is not available, but it is clear  
29  
30 that the published reports include all expected outcomes, including those that were pre-  
31  
32 specified (convincing text of this nature may be uncommon). Unclear risk of bias:  
33  
34 Insufficient information to permit judgement of 'low risk' or 'high risk'. High risk of bias: Not  
35  
36 all of the study's pre-specified primary outcomes have been reported; one or more primary  
37  
38 outcomes is reported using measurements, analysis methods or subsets of the data that  
39  
40 were not pre-specified; one or more reported primary outcomes were not pre-specified  
41  
42 (unless clear justification for their reporting is provided, such as an unexpected adverse  
43  
44 effect); one or more outcomes of interest in the review are reported incompletely so that  
45  
46 they cannot be entered in a meta-analysis; the study report fails to include results for a key  
47  
48 outcome that would be expected to have been reported for such a study.  
49  
50

51  
52  
53 **Other bias:** Low risk: The study appears to be free of other sources of bias. Unclear risk of  
54  
55 bias: Insufficient information to assess whether an important risk of bias exists. High risk:  
56  
57  
58  
59  
60

1  
2  
3  
4 The study had a potential source of bias related to the specific study design used, or has  
5  
6 been claimed to have been fraudulent, or had some other problem.  
7  
8

### 9 10 **Statistical analysis**

11 The analyses were performed in Stata version 13 (STATA Corp, Texas, USA). Random  
12 effects meta-analyses were performed due to an expected between study heterogeneity.  
13  
14 The results were expressed as risk differences with 95% confidence intervals (CI) and p  
15  
16 values and  $I^2$  as a measure of heterogeneity and with the number needed to treat for  
17  
18 statistically significant outcome measures. We defined  $I^2$  values below 30% as  
19  
20 unimportant, 30-50% as moderate heterogeneity, 50-75% as substantial heterogeneity and  
21  
22 >75% as considerable heterogeneity. All patients were included in the analysis irrespective  
23  
24 of compliance or follow-up and with imputation of outcomes for patients with missing  
25  
26 outcome data (intention to treat). Mixed effect multilevel meta-regression and subgroup  
27  
28 analyses were performed to evaluate heterogeneity. The meta-regression analysis  
29  
30 evaluated the influence of the metabolic regulation ( $HbA_{1c} \leq 8.5\%$  (69 mmol/mol)), duration  
31  
32 of diabetes ( $\geq 5$  years), and body mass index (BMI) (normal weight  $\leq 25$  kg/m<sup>2</sup>, overweight  
33  
34 >25 kg/m<sup>2</sup> or obese >30 kg/m<sup>2</sup>). Post hoc analyses were performed to evaluate the effect  
35  
36 of the change in bodyweight and ALT. The subgroup analyses evaluated the influence of  
37  
38 publication status (full paper articles compared with abstracts and unpublished trials),  
39  
40 control groups and collateral interventions. Since all trials had a low risk of bias, we did not  
41  
42 perform subgroup analyses on bias control. Publication bias and other small study effects  
43  
44 were estimated in regression analyses (Harbord's test) and funnel plots. We performed  
45  
46 sequential analyses to evaluate the robustness of results from meta-analyses with a  
47  
48 statistically significant result. The analysis was performed with alpha 5%, power 80%,  
49  
50  
51  
52  
53  
54  
55  
56  
57  
58  
59  
60

1  
2  
3  
4 model-based diversity correction 12%, relative risk reduction 8% and control group  
5  
6 incidence rate 51%.  
7  
8

## 9 10 **Results**

11  
12 The initial searches identified 531 potentially eligible records (figure 1). After reading the  
13 titles and abstracts, duplicates and records that clearly did not describe RCTs on  
14 lixisenatide were excluded. One ongoing trial was excluded because data were not yet  
15 available. The remaining records referred to 15 multicentre RCTs that were included in the  
16 qualitative and quantitative analyses (table 1). Eleven trials were published as full paper  
17 articles,[21-31] three were published as abstracts[32-34] and one was unpublished.  
18  
19  
20  
21  
22  
23  
24

25  
26 The trials included patients with type 2 diabetes diagnosed based on glycated  
27 haemoglobin or fasting glucose with inadequate metabolic control on current intervention  
28 regimens. The exclusion criteria varied, but overall, none of the trials included patients with  
29 an ongoing drug or alcohol abuse, or patients with pancreatitis, gastric surgery,  
30 inflammatory bowel disease or other severe systemic illnesses such as alcoholic liver  
31 disease. All trials were designed to evaluate the effect of lixisenatide on metabolic  
32 regulation.  
33  
34  
35  
36  
37  
38  
39  
40

41  
42 None of the included trials found statistically significant differences between patient  
43 characteristics in the lixisenatide and control groups. The proportion of men was 50% and  
44 the mean age in the lixisenatide and control group ranged from 43 to 61 years (table 2).  
45  
46 For the lixisenatide group, mean BMI ranged from 25.1 to 36.8 kg/m<sup>2</sup> and the mean HbA<sub>1c</sub>  
47 from 7.2 to 8.5% (53 to 69 mmol/mol). For the control group, the mean BMI ranged from  
48 25.2 to 36.8 kg/m<sup>2</sup> and the HbA<sub>1c</sub> 7.4 to 8.9% (56 to 74 mmol/mol). Table 3 shows the  
49 mean baseline liver blood tests in the lixisenatide and control groups. The proportion of  
50  
51  
52  
53  
54  
55  
56  
57  
58  
59  
60

1  
2  
3  
4 patients with elevated ALT ranged from 20 to 77% for the lixisenatide group and from 19 to  
5  
6 75% for the control groups. All trials randomised patients based on computer-generated  
7  
8 random numbers with central randomisation. RCTs with a placebo control group were  
9  
10 double blind with blinding of participants and personnel. RCTs with an active control group  
11  
12 were open. All outcomes were objective (blood tests). We estimated that the outcomes  
13  
14 were not likely to be influenced by lack of blinding and therefore classed all trials as having  
15  
16 a low risk of bias in the domains blinding of participants and personnel and blinding of  
17  
18 outcome assessment. All patients were accounted for and included in the analyses and all  
19  
20 clinically relevant outcomes were defined and reported. No discrepancies were detected  
21  
22 between the protocol and reported outcomes. No other biases were detected. We  
23  
24 therefore classed all RCTs as having a low risk of bias.  
25  
26  
27

28 The duration of therapy ranged from 4 to 76 weeks (mean 29 weeks). Two trials (one  
29  
30 unpublished)[21] were designed to evaluate dose titration. The dose of lixisenatide was 20  
31  
32 microgram once-daily in the remaining trials. Twelve trials compared lixisenatide versus  
33  
34 placebo and three trials compared lixisenatide versus active controls administered once-  
35  
36 daily (liraglutide and sitagliptin) or twice daily (exenatide). The collateral interventions  
37  
38 (background therapy) were metformin (five trials), metformin and sulphonylurea (four  
39  
40 trials), metformin and pioglitazone (one trial), insulin (three trials) or diet (one trial). The  
41  
42 collateral interventions were administered equally to the lixisenatide and control groups.  
43  
44  
45

46  
47 In total, 1,070 patients had elevated ALT at baseline (figure 2). Lixisenatide had a  
48  
49 beneficial effect on normalisation of ALT (risk difference 0.07; 95% CI 0.01 to 0.14;  
50  
51  $I^2=23\%$ ; number needed to treat 14 patients,  $p=0.042$ ). The sequential analysis confirmed  
52  
53 the primary meta-analysis when using the traditional 5% level of statistical significance  
54  
55 (figure 3), but not after adjusting for multiple testing (the trial monitoring boundary was not  
56  
57  
58  
59  
60

1  
2  
3  
4 crossed). Mixed effect multilevel meta-regression analyses of double blind trials (figure 4)  
5  
6 found no effect of the metabolic regulation, duration of diabetes or BMI on the overall  
7  
8 result ( $p>0.05$  for all analyses). There was no difference between patients with a BMI<25  
9  
10 or a BMI $\geq$ 25. When the analyses were repeated for RCTs with an active control group,  
11  
12 lixisenatide had a beneficial effect on normalisation of ALT among patients who were  
13  
14 obese ( $p=0.01$ ) or overweight ( $p=0.004$ ), but not among normal weight patients ( $p=0.98$ ).  
15  
16 Random effects subgroup meta-analyses of RCTs with an active comparator found a  
17  
18 beneficial effect of lixisenatide in patients with a BMI $\geq$ 25 (0.07; 0.02 to 0.12;  $p=0.004$ ), but  
19  
20 not in patients with a BMI<25 (-0.04; -0.36 to 0.27;  $p=0.28$ ). There was a moderate  
21  
22 correlation between change in bodyweight and change in ALT (regression  
23  
24 coefficient=0.38). The baseline metabolic regulation and duration of diabetes did not  
25  
26 predict the intervention effect. No evidence of small study effects was seen in regression  
27  
28 analysis (Harbord's test,  $p=0.26$ ) or funnel plots (figure 5). Subgroup analyses showed no  
29  
30 differences between trials stratified by the publication status, control groups or collateral  
31  
32 interventions.  
33  
34  
35  
36  
37

38 In total, 191 of 303 (37%) patients randomised to lixisenatide and 128 of 216 (41%)  
39  
40 controls achieved normalisation of AST after treatment (figure 5). Random effects meta-  
41  
42 analysis found no effect of lixisenatide on AST (0.06; -0.04 to 0.17), alkaline phosphatase  
43  
44 (-0.10; -0.23 to 0.03), bilirubin (-0.12, -0.30 to 0.07) or normalisation of all liver blood tests  
45  
46 (0.01, -0.01 to 0.03). No differences between subgroups were identified.  
47  
48  
49

## 50 Discussion

51  
52  
53 This systematic review evaluated the effects of lixisenatide on elevated transaminases  
54  
55 among patients with type 2 diabetes and a high risk of NAFLD. Analyses of outcome  
56  
57  
58  
59  
60



1  
2  
3  
4 measures recalculated based on individual patient data showed that lixisenatide increased  
5 the proportion of patients who achieved normal ALT levels compared with placebo or other  
6 glucose lowering agents. The number needed to treat was 14 patients suggesting that the  
7 size of the potential benefit is clinically relevant. Our subgroup analyses suggested that  
8 lixisenatide was more effective in obese patients. We also found that lixisenatide was more  
9 effective than other active controls, which included liraglutide, sitagliptin and exenatide.  
10 However, the number of patients in the subgroup analyses was small and the findings  
11 therefore uncertain. Furthermore, ALT is used in the diagnostic evaluations and follow-up  
12 of patients with NAFLD and NASH in clinical practice, but previous evidence suggests that  
13 the sensitivity is low. The low sensitivity suggests that we may overlook intervention  
14 benefits. Additional information about outcomes such as histological changes is needed.

15  
16  
17  
18  
19  
20  
21  
22  
23  
24  
25  
26  
27  
28  
29 Individual patient data meta-analyses are based on the original research data instead of  
30 data extracted from published reports. The benefits of this approach include a reduced risk  
31 of errors as well as the ability to perform the relevant subgroup and sensitivity analyses.  
32 The quality of such analyses is high and individual patient data meta-analyses are  
33 considered as a 'gold standard' of systematic reviews.[35 36] The main limitation of our  
34 review is related to the number of events and patients. As demonstrated in our sequential  
35 analyses, the available evidence cannot support or refute clinically relevant intervention  
36 effects. None the included trials were specifically designed to evaluate the effect of  
37 lixisenatide on patients with NAFLD or NASH. However, one of the specific strengths of  
38 the meta-analytic approach is that it allows an assessment of questions not posed by the  
39 individual studies. In general, analyses of specific subgroups may be difficult in systematic  
40 reviews of RCT that are based on published data. By contrast, such subsets of participants  
41 can be analysed when individual patient data are collected.[37] Lixisenatide only appeared  
42  
43  
44  
45  
46  
47  
48  
49  
50  
51  
52  
53  
54  
55  
56  
57  
58  
59  
60

1  
2  
3  
4 to have an effect on ALT, which is the most sensitive biochemical marker of NAFLD. The  
5  
6 objective nature of the outcome measure strengthens the validity of our findings.  
7  
8 Theoretically, our analyses would have been more sensitive if we had analysed the  
9  
10 change in ALT as a continuous outcome. However, there is no clear evidence between  
11  
12 quantitative changes in ALT and intervention effects. We found no beneficial or detrimental  
13  
14 effects when analysing the remaining liver blood tests.  
15  
16

17  
18 Incretin-based therapies such as lixisenatide and other GLP-1RAs are an important part of  
19  
20 the pharmacological treatment of patients with type 2 diabetes. Experimental studies  
21  
22 suggest that activation of GLP-1 receptors may prevent diabetes-related comorbidity  
23  
24 including obesity and NASH[38] and that GLP-1RAs may improve hepatic steatosis.[39]  
25  
26

27 The beneficial effects of GLP-1RA include improved glycaemic control as well as beneficial  
28  
29 effects on bodyweight, blood pressure, cholesterol and cardiovascular biomarkers.  
30  
31 Lixisenatide is a once-daily GLP-1RA. The included RCTs found beneficial effects of  
32  
33 lixisenatide used as monotherapy or in combination with metformin, sulphonylureas,  
34  
35 thiazolidinediones or basal insulin glargine. The improved glycaemic control was mainly  
36  
37 demonstrated in RCTs with a placebo control. Conversely, we found that the benefit of  
38  
39 lixisenatide on liver blood tests was more pronounced in RCTs with an active control  
40  
41 group. This result suggests that improved metabolic regulation and reductions in body  
42  
43 weight may not be the only reason for the potentially beneficial effect on lixisenatide on  
44  
45 NAFLD. Some experimental studies suggest that hepatocytes have specific GLP-1  
46  
47 receptors.[17 40] The findings are controversial. In theory, different GLP-1RA may vary in  
48  
49 their receptor affinity. The differences between the intervention effects in RCTs with an  
50  
51 active comparator and placebo-controlled trials could also reflect the proportion of patients  
52  
53 who were overweight. However, at present there is no clear evidence to support or refute  
54  
55  
56  
57  
58  
59  
60

1  
2  
3  
4 this theory. Although we found a potential difference between lixisenatide and other GLP-  
5  
6 1RA, the number of trials and the number of patients was too small to make any definite  
7  
8 conclusions.  
9

10  
11 It may be argued that the beneficial effect of lixisenatide reflects changes to the daily  
12  
13 intake of alcohol due to gastrointestinal adverse effects. However, none of the primary  
14  
15 RCTs included patients with an ongoing alcohol abuse or alcoholic liver disease. None of  
16  
17 the RCTs collected data on the exact daily intake of alcohol during the trial. We were  
18  
19 therefore unable to determine the potential influence of alcohol.  
20  
21

22  
23 In conclusion, the risk of bias in this systematic review was small supporting the validity of  
24  
25 our findings. The use of lixisenatide seems to have beneficial effects on elevated levels of  
26  
27 ALT in patients with type 2 diabetes and could possibly have a role in the treatment of  
28  
29 patients with type 2 diabetes and NAFLD. We found potential differences between patients  
30  
31 who were obese or normal weight and trials with a placebo control or active comparator.  
32  
33 However, additional trials are clearly needed to assess our findings. The evidence does  
34  
35 not allow definite treatment recommendations.  
36  
37  
38  
39  
40  
41  
42  
43  
44  
45  
46  
47  
48  
49  
50  
51  
52  
53  
54  
55  
56  
57  
58  
59  
60

1  
2  
3  
4 **Funding** This research received no specific grant from any funding agency in the public,  
5 commercial or not-for-profit sectors. Data were received from Sanofi-Aventis. The paper  
6 was sent to Sanofi-Aventis before submission, but the writing, interpretation of data and  
7 conclusions were the sole responsibility of the authors who also made the final decision to  
8 submit the paper for publication.  
9

10  
11 **Competing interests** None of the authors have competing interests specifically related to  
12 the present work. L.L. Gluud has participated as an investigator in a trial funded by  
13 MSD.F.K. Knop has received research funding from Sanofi-Aventis and lecture fees from  
14 AstraZeneca, Boehringer Ingelheim Pharmaceuticals, Bristol-Myers Squibb, Eli Lilly and  
15 Company, Gilead Sciences, Merck Sharp & Dohme, Novo Nordisk, Ono Pharmaceuticals,  
16 Sanofi-Aventis, and Zealand Pharma, is part of the Advisory Boards of Eli Lilly, Bristol-  
17 Myers Squibb/AstraZeneca, Novo Nordisk and Zealand Pharma, and has consulted for  
18 AstraZeneca, Gilead Sciences, Ono Pharmaceuticals, Novo Nordisk, Sanofi-Aventis and  
19 Zealand Pharma. T. Vilsbøll has received fees for being part of an advisory board from  
20 AstraZeneca, Boehringer Ingelheim Pharmaceuticals, Bristol-Myers Squibb, Eli Lilly and  
21 Company, GI Dynamics, Merck Sharp & Dohme, Novo Nordisk, Sanofi-Aventis and  
22 Takeda, and received fees for speaking from AstraZeneca, Boehringer Ingelheim  
23 Pharmaceuticals, Bristol-Myers Squibb, Eli Lilly and Company, Merck Sharp & Dohme,  
24 Novo Nordisk, Novartis, Sanofi-Aventis, Takeda and Zealand Pharma, and received  
25 research support from Novo Nordisk.  
26  
27  
28  
29  
30  
31  
32  
33  
34  
35  
36  
37  
38  
39  
40  
41  
42  
43  
44  
45  
46  
47

48 **Acknowledgement** Thank you to Elena Nikolova and Edward Wang from Sanofi-Aventis  
49 for their statistical help and for retrieving data from included trials.  
50  
51  
52  
53  
54  
55  
56  
57  
58  
59  
60

## Legends to figures

**Figure 1** Trial flow chart.

**Figure 2** Random effects meta-analysis of randomised controlled trials on normalisation of alanine aminotransferase (ALT). The result of the analysis is expressed as the risk difference (RD) with 95% confidence intervals (CI) and level of significance (p value). The intervention comparisons are lixisenatide versus placebo or active interventions. The included patients have type 2 diabetes and elevated ALT at baseline. The outcome measure is normalisation of ALT.

**Figure 3** Sequential analysis of risk ratios (random effects) in randomised controlled trials on lixisenatide versus placebo or active interventions for patients with type 2 diabetes and elevated alanine aminotransferase (ALT) at baseline. The analysis was performed with alpha 5%, power 80%, model-based diversity correction 12%, relative risk reduction 8% and control group incidence rate 51%. The outcome measure is normalisation of ALT. The analysis shows that lixisenatide has a beneficial effect on normalisation of ALT when assessed using the traditional 5% level of significance (the horizontal line), but not after adjusting for cumulative assessment (the trial monitoring boundary).

**Figure 4** Mixed model meta-regression analysis of the effect of lixisenatide versus placebo on normalisation of alanine aminotransferase (ALT). Included patients have type 2 diabetes and elevated ALT at baseline. The outcome measure is normalisation of ALT. The figure shows the estimated intervention effect (normalisation of ALT) on the log-odds ratio scale in relation to the baseline body weight of included patients from 12 randomised placebo-controlled trials. The size (area) of each circle is inversely proportional to the variance of the log-odds ratio (the larger the circle the less the variance).

1  
2  
3  
4 **Figure 5** Random effects meta-analysis of randomised controlled trials on normalisation of  
5 aspartate aminotransferase (AST). The result of the analysis is expressed as the risk  
6 difference (RD) with 95% confidence intervals (CI) and level of significance (p value). The  
7  
8 intervention comparisons are lixisenatide versus placebo or active interventions. The  
9  
10 included patients have type 2 diabetes and elevated ALT at baseline. The outcome  
11  
12 measure is normalisation of ALT.  
13  
14  
15  
16  
17  
18  
19  
20  
21  
22  
23  
24  
25  
26  
27  
28  
29  
30  
31  
32  
33  
34  
35  
36  
37  
38  
39  
40  
41  
42  
43  
44  
45  
46  
47  
48  
49  
50  
51  
52  
53  
54  
55  
56  
57  
58  
59  
60

## REFERENCES

1. Verbeek J, Cassiman D, Lannoo M, et al. Treatment of non-alcoholic fatty liver disease: can we already face the epidemic? *Acta Gastroenterol Belg* 2013;**76**(2):200-9.
2. Parkash O, Hamid S. Are we ready for a new epidemic of under recognized liver disease in South Asia especially in Pakistan? Non alcoholic fatty liver disease. *J Pak Med Assoc* 2013;**63**(1):95-9.
3. Blachier M, Leleu H, Peck-Radosavljevic M, Valla DC, Roudot-Thoraval F. The burden of liver disease in Europe: a review of available epidemiological data. *Journal of hepatology* 2013;**58**(3):593-608.
4. Szczepaniak LS, Nurenberg P, Leonard D, et al. Magnetic resonance spectroscopy to measure hepatic triglyceride content: prevalence of hepatic steatosis in the general population. *American journal of physiology. Endocrinology and metabolism* 2005;**288**(2):E462-8.
5. Bedogni G, Miglioli L, Masutti F, Tiribelli C, Marchesini G, Bellentani S. Prevalence of and risk factors for nonalcoholic fatty liver disease: the Dionysos nutrition and liver study. *Hepatology* 2005;**42**(1):44-52.
6. Targher G, Bertolini L, Padovani R, et al. Prevalence of nonalcoholic fatty liver disease and its association with cardiovascular disease among type 2 diabetic patients. *Diabetes Care* 2007;**30**(5):1212-8.
7. Estep JM, Birerdinc A, Younossi Z. Non-invasive diagnostic tests for non-alcoholic fatty liver disease. *Curr Mol Med* 2010;**10**(2):166-72.
8. Miller MH, Ferguson MA, Dillon JF. Systematic review of performance of non-invasive biomarkers in the evaluation of non-alcoholic fatty liver disease. *Liver Int* 2011;**31**(4):461-73.
9. Barsic N, Lerotic I, Smircic-Duvnjak L, Tomasic V, Duvnjak M. Overview and developments in noninvasive diagnosis of nonalcoholic fatty liver disease. *World J Gastroenterol* 2012;**18**(30):3945-54.
10. Terjung B, Lemnitzer I, Dumoulin FL, et al. Bleeding complications after percutaneous liver biopsy. An analysis of risk factors. *Digestion* 2003;**67**(3):138-45.
11. Copel L, Sosna J, Kruskal JB, Kane RA. Ultrasound-guided percutaneous liver biopsy: indications, risks, and technique. *Surg Technol Int* 2003;**11**:154-60.
12. Angelico F, Burattin M, Alessandri C, Del Ben M, Lirussi F. Drugs improving insulin resistance for non-alcoholic fatty liver disease and/or non-alcoholic steatohepatitis. *Cochrane Database Syst Rev* 2007(1):CD005166.
13. Shyangdan D, Clar C, Ghouri N, et al. Insulin sensitisers in the treatment of non-alcoholic fatty liver disease: a systematic review. *Health Technol Assess* 2011;**15**(38):1-110.
14. Dormandy J, Bhattacharya M, van Troostenburg de Bruyn AR. Safety and tolerability of pioglitazone in high-risk patients with type 2 diabetes: an overview of data from PROactive. *Drug Saf* 2009;**32**(3):187-202.
15. Lewis JD, Habel L, Quesenberry C, et al. Proteinuria testing among patients with diabetes mellitus is associated with bladder cancer diagnosis: potential for unmeasured confounding in studies of pioglitazone and bladder cancer. *Pharmacoepidemiology and drug safety* 2014;**23**(6):636-45.
16. Diaz-Soto G, de Luis DA, Conde-Vicente R, Izaola-Jauregui O, Ramos C, Romero E. Beneficial effects of liraglutide on adipocytokines, insulin sensitivity parameters and

- 1  
2  
3  
4 cardiovascular risk biomarkers in patients with Type 2 diabetes: a prospective  
5 study. *Diabetes research and clinical practice* 2014;**104**(1):92-6.
- 6 17. Gupta NA, Mellis J, Dunham RM, et al. Glucagon-like peptide-1 receptor is present on  
7 human hepatocytes and has a direct role in decreasing hepatic steatosis in vitro by  
8 modulating elements of the insulin signaling pathway. *Hepatology* 2010;**51**(5):1584-  
9 92.
- 10 18. Vilsboll T, Christensen M, Junker AE, Knop FK, Gluud LL. Effects of glucagon-like  
11 peptide-1 receptor agonists on weight loss: systematic review and meta-analyses of  
12 randomised controlled trials. *BMJ* 2012;**344**:d7771.
- 13 19. Scott LJ. Lixisenatide: a review of its use in patients with type 2 diabetes mellitus.  
14 *BioDrugs* 2013;**27**(5):509-23.
- 15 20. Christensen M, Knop FK, Vilsboll T, Holst JJ. Lixisenatide for type 2 diabetes mellitus.  
16 *Expert Opin Investig Drugs* 2011;**20**(4):549-57.
- 17 21. Lorenz M, Pfeiffer C, Steinstrasser A, et al. Effects of lixisenatide once daily on gastric  
18 emptying in type 2 diabetes - Relationship to postprandial glycemia. *Regul Pept*  
19 2013;**185C**:1-8.
- 20 22. Ratner RE, Rosenstock J, Boka G. Dose-dependent effects of the once-daily GLP-1  
21 receptor agonist lixisenatide in patients with Type 2 diabetes inadequately  
22 controlled with metformin: a randomized, double-blind, placebo-controlled trial.  
23 *Diabet Med* 2010;**27**(9):1024-32.
- 24 23. Riddle MC, Aronson R, Home P, et al. Adding Once-Daily Lixisenatide for Type 2  
25 Diabetes Inadequately Controlled by Established Basal Insulin A 24-week,  
26 randomized, placebo-controlled comparison (GetGoal-L). *Diabetes Care*  
27 2013;**36**(9):2489-96.
- 28 24. Riddle MC, Forst T, Aronson R, et al. Adding Once-Daily Lixisenatide for Type 2  
29 Diabetes Inadequately Controlled With Newly Initiated and Continuously Titrated  
30 Basal Insulin Glargine A 24-week, randomized, placebo-controlled study (GetGoal-  
31 Duo 1). *Diabetes Care* 2013;**36**(9):2497-503.
- 32 25. Seino Y, Min KW, Niemoeller E, Takami A. Randomized, double-blind, placebo-  
33 controlled trial of the once-daily GLP-1 receptor agonist lixisenatide in Asian  
34 patients with type 2 diabetes insufficiently controlled on basal insulin with or without  
35 a sulfonylurea (GetGoal-L-Asia). *Diabetes Obes Metab* 2012;**14**(10):910-7.
- 36 26. Ahren B, Dimas AL, Miossec P, Saubadu S, Aronson R. Efficacy and Safety of  
37 Lixisenatide Once-Daily Morning or Evening Injections in Type 2 Diabetes  
38 Inadequately Controlled on Metformin (GetGoal-M). *Diabetes Care*  
39 2013;**36**(9):2543-50.
- 40 27. Fonseca VA, Alvarado-Ruiz R, Raccach D, Boka G, Miossec P, Gerich JE. Efficacy and  
41 safety of the once-daily GLP-1 receptor agonist lixisenatide in monotherapy: a  
42 randomized, double-blind, placebo-controlled trial in patients with type 2 diabetes  
43 (GetGoal-Mono). *Diabetes Care* 2012;**35**(6):1225-31.
- 44 28. Kapitza C, Forst T, Coester HV, Poitiers F, Ruus P, Hincelin-Mery A.  
45 Pharmacodynamic characteristics of lixisenatide once daily versus liraglutide once  
46 daily in patients with type 2 diabetes insufficiently controlled on metformin. *Diabetes*  
47 *Obes. Metab.* 2013;**15**(7):642-49.
- 48 29. Rosenstock J, Raccach D, Koranyi L, et al. Efficacy and Safety of Lixisenatide Once  
49 Daily Versus Exenatide Twice Daily in Type 2 Diabetes Inadequately Controlled on  
50 Metformin: A 24-Week, Randomized, Open-Label, Active-Controlled Study  
51 (GetGoal-X). *Diabetes Care* 2013.
- 52  
53  
54  
55  
56  
57  
58  
59  
60



- 1
- 2
- 3
- 4 30. Pinget M, Goldenberg R, Niemoeller E, Muehlen-Bartmer I, Guo H, Aronson R.  
5 Efficacy and safety of lixisenatide once daily versus placebo in type 2 diabetes  
6 insufficiently controlled on pioglitazone (GetGoal-P). *Diabetes Obes Metab* 2013.
- 7 31. Bolli GB, Munteanu M, Dotsenko S, et al. Efficacy and safety of lixisenatide once daily  
8 vs. placebo in people with Type 2 diabetes insufficiently controlled on metformin  
9 (GetGoal-F1). *Diabet Med* 2013.
- 10 32. Ratner REH, M.; Shamanna, P.; Min, K.; Boka, G.; Miossec, P.; Muehlen-Bartmer, I.;  
11 Rosenstock, J.; . Efficacy and safety of lixisenatide once daily versus placebo in  
12 patients with T2DM insufficiently controlled on sulfonylurea + metformin (GetGoal-  
13 S). *Diabetologia* 2011;**54**(11):785.
- 14 33. Seino YT, A.; Niemoeller, E.; Sakaki, T.; on behalf of the GetGoal-Mono Study Group.  
15 Long-term Safety of Once-daily (QD) Lixisenatide in Japanese Patients with Type  
16 2 Diabetes Mellitus (T2DM): GetGoal-Mono Japan. <http://www.aa-sd.org/> 2012.
- 17 34. Pan CYS, S.; Niemoeller, E.; on behalf of the GetGoal-M Asia Study Investigators.  
18 Lixisenatide in Asian Patients with Type 2 Diabetes (T2DM) Uncontrolled on  
19 Metformin ± Sulfonylurea (SU): GetGoal-M Asia. <http://www.aa-sd.org/> 2012.
- 20 35. <http://handbook.cochrane.org/>. Cochrane Handbook for Systematic Reviews of  
21 Interventions. Secondary Cochrane Handbook for Systematic Reviews of  
22 Interventions.
- 23 36. Stewart GB, Altman DG, Askie LM, Duley L, Simmonds MC, Stewart LA. Statistical  
24 analysis of individual participant data meta-analyses: a comparison of methods and  
25 recommendations for practice. *PLoS One* 2012;**7**(10):e46042.
- 26 37. Deeks JJ, Higgins JP, Altman D, editors. *Chapter 9: Analysing data and undertaking*  
27 *meta-analyses*, 2011.
- 28 38. Seino Y, Yabe D. Glucose-dependent insulinotropic polypeptide and glucagon-like  
29 peptide-1: Incretin actions beyond the pancreas. *Journal of diabetes investigation*  
30 2013;**4**(2):108-30.
- 31 39. Samson SL, Bajaj M. Potential of incretin-based therapies for non-alcoholic fatty liver  
32 disease. *Journal of diabetes and its complications* 2013;**27**(4):401-6.
- 33 40. Ding X, Saxena NK, Lin S, Gupta NA, Anania FA. Exendin-4, a glucagon-like protein-1  
34 (GLP-1) receptor agonist, reverses hepatic steatosis in ob/ob mice. *Hepatology*  
35 2006;**43**(1):173-81.
- 36
- 37
- 38
- 39
- 40
- 41
- 42
- 43
- 44
- 45
- 46
- 47
- 48
- 49
- 50
- 51
- 52
- 53
- 54
- 55
- 56
- 57
- 58
- 59
- 60

1  
2  
3  
4  
5  
6  
7  
8  
9  
10  
11  
12  
13  
14  
15  
16  
17  
18  
19  
20  
21  
22  
23  
24  
25  
26  
27  
28  
29  
30  
31  
32  
33  
34  
35  
36  
37  
38  
39  
40  
41  
42  
43  
44  
45  
46  
47  
48  
49  
50  
51  
52  
53  
54  
55  
56  
57  
58  
59  
60

Figure 1

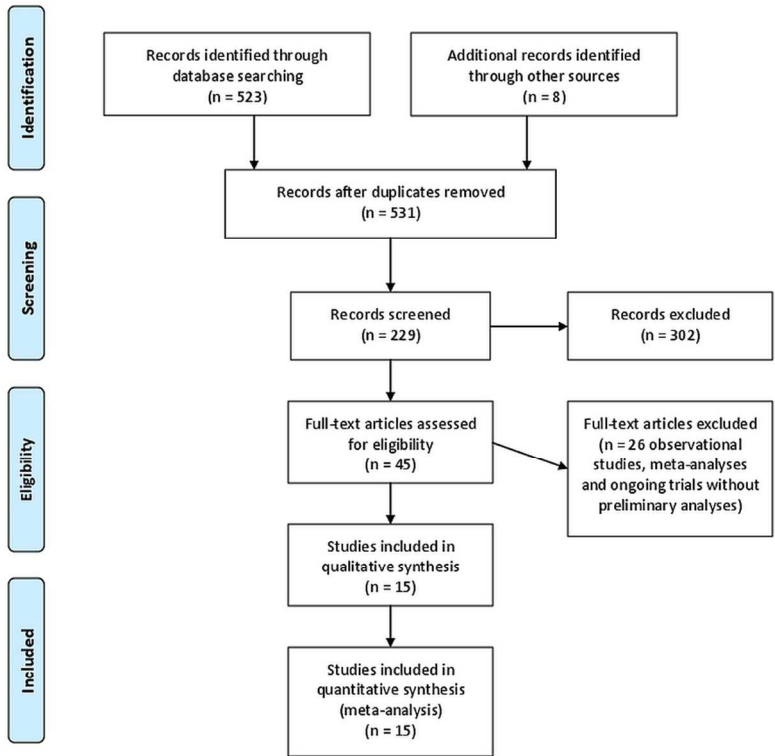

From: Moher D, Liberati A, Tetzlaff J, Altman DG, The PRISMA Group (2009). Preferred Reporting Items for Systematic Reviews and Meta-Analyses: The PRISMA Statement. PLoS Med 6(6): e1000097. doi:10.1371/journal.pmed.1000097

For more information, visit [www.prisma-statement.org](http://www.prisma-statement.org).

90x116mm (300 x 300 DPI)

Figure 2

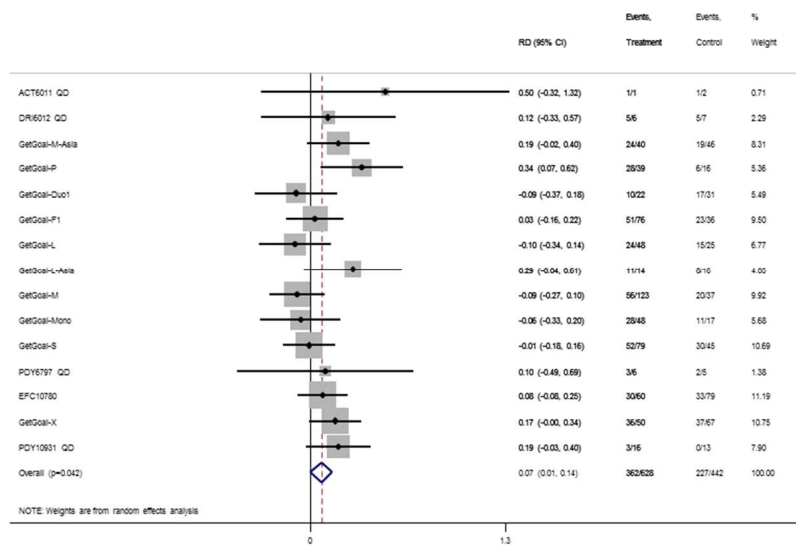

81x60mm (300 x 300 DPI)

Review only

1  
2  
3  
4  
5  
6  
7  
8  
9  
10  
11  
12  
13  
14  
15  
16  
17  
18  
19  
20  
21  
22  
23  
24  
25  
26  
27  
28  
29  
30  
31  
32  
33  
34  
35  
36  
37  
38  
39  
40  
41  
42  
43  
44  
45  
46  
47  
48  
49  
50  
51  
52  
53  
54  
55  
56  
57  
58  
59  
60

Figure 3

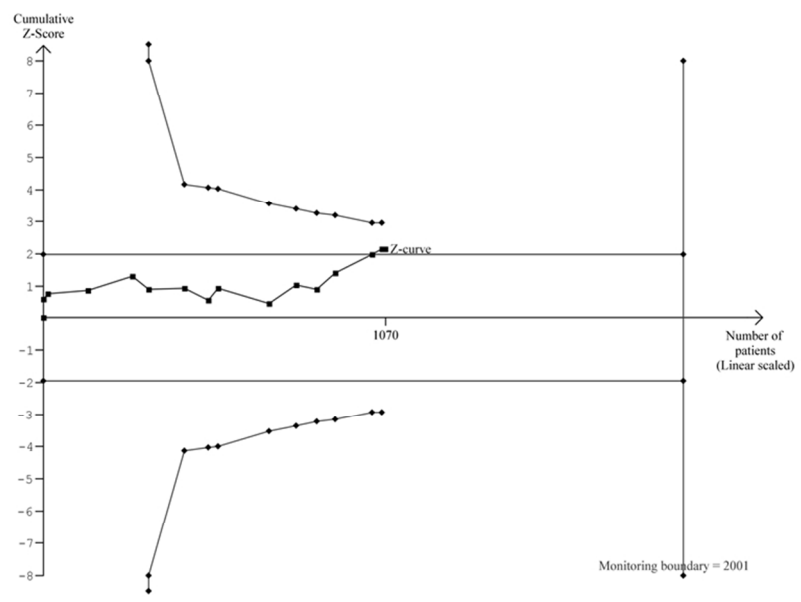

81x60mm (300 x 300 DPI)

ew only

Figure 4

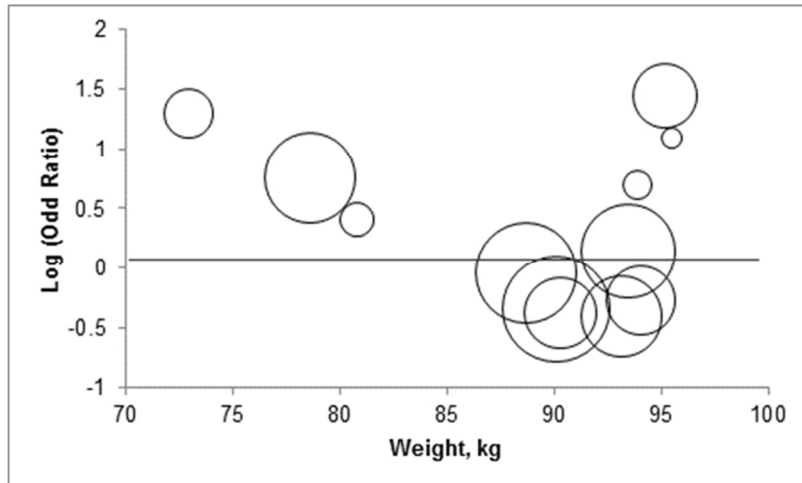

81x60mm (300 x 300 DPI)

View only

1  
2  
3  
4  
5  
6  
7  
8  
9  
10  
11  
12  
13  
14  
15  
16  
17  
18  
19  
20  
21  
22  
23  
24  
25  
26  
27  
28  
29  
30  
31  
32  
33  
34  
35  
36  
37  
38  
39  
40  
41  
42  
43  
44  
45  
46  
47  
48  
49  
50  
51  
52  
53  
54  
55  
56  
57  
58  
59  
60

1  
2  
3  
4  
5  
6  
7  
8  
9  
10  
11  
12  
13  
14  
15  
16  
17  
18  
19  
20  
21  
22  
23  
24  
25  
26  
27  
28  
29  
30  
31  
32  
33  
34  
35  
36  
37  
38  
39  
40  
41  
42  
43  
44  
45  
46  
47  
48  
49  
50  
51  
52  
53  
54  
55  
56  
57  
58  
59  
60

Figure 5

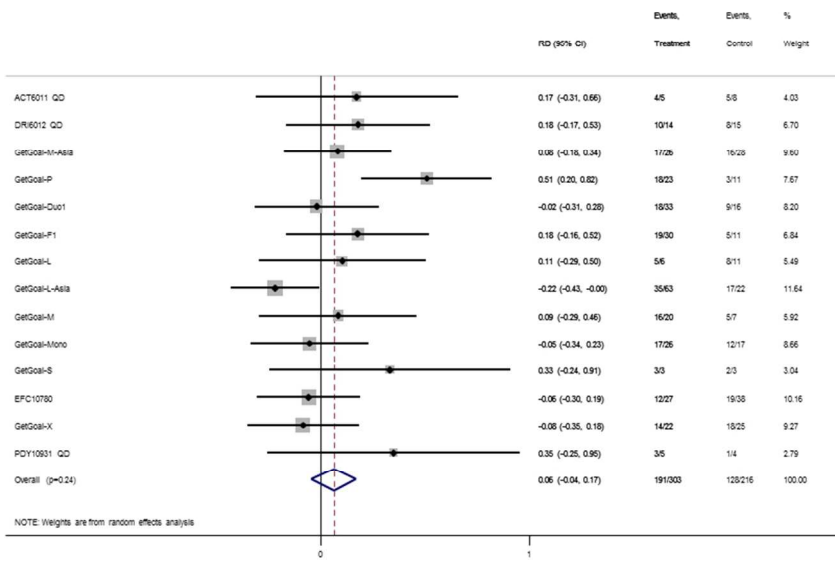

81x60mm (300 x 300 DPI)

Review only

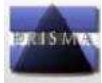

# PRISMA 2009 Checklist

1  
2  
3  
4  
5  
6  
7  
8  
9  
10  
11  
12  
13  
14  
15  
16  
17  
18  
19  
20  
21  
22  
23  
24  
25  
26  
27  
28  
29  
30  
31  
32  
33  
34  
35  
36  
37  
38  
39  
40  
41  
42  
43  
44  
45  
46  
47  
48  
49

| Section/topic                      | #  | Checklist item                                                                                                                                                                                                                                                                                              | Reported on page # |
|------------------------------------|----|-------------------------------------------------------------------------------------------------------------------------------------------------------------------------------------------------------------------------------------------------------------------------------------------------------------|--------------------|
| <b>TITLE</b>                       |    |                                                                                                                                                                                                                                                                                                             |                    |
| Title                              | 1  | Identify the report as a systematic review, meta-analysis, or both.                                                                                                                                                                                                                                         | 1                  |
| <b>ABSTRACT</b>                    |    |                                                                                                                                                                                                                                                                                                             |                    |
| Structured summary                 | 2  | Provide a structured summary including, as applicable: background; objectives; data sources; study eligibility criteria, participants, and interventions; study appraisal and synthesis methods; results; limitations; conclusions and implications of key findings; systematic review registration number. | 3-4                |
| <b>INTRODUCTION</b>                |    |                                                                                                                                                                                                                                                                                                             |                    |
| Rationale                          | 3  | Describe the rationale for the review in the context of what is already known.                                                                                                                                                                                                                              | 5-6                |
| Objectives                         | 4  | Provide an explicit statement of questions being addressed with reference to participants, interventions, comparisons, outcomes, and study design (PICOS).                                                                                                                                                  | 6                  |
| <b>METHODS</b>                     |    |                                                                                                                                                                                                                                                                                                             |                    |
| Protocol and registration          | 5  | Indicate if a review protocol exists, if and where it can be accessed (e.g., Web address), and, if available, provide registration information including registration number.                                                                                                                               | 6                  |
| Eligibility criteria               | 6  | Specify study characteristics (e.g., PICOS, length of follow-up) and report characteristics (e.g., years considered, language, publication status) used as criteria for eligibility, giving rationale.                                                                                                      | 6-7                |
| Information sources                | 7  | Describe all information sources (e.g., databases with dates of coverage, contact with study authors to identify additional studies) in the search and date last searched.                                                                                                                                  | 7                  |
| Search                             | 8  | Present full electronic search strategy for at least one database, including any limits used, such that it could be repeated.                                                                                                                                                                               | 7                  |
| Study selection                    | 9  | State the process for selecting studies (i.e., screening, eligibility, included in systematic review, and, if applicable, included in the meta-analysis).                                                                                                                                                   | 6-7                |
| Data collection process            | 10 | Describe method of data extraction from reports (e.g., piloted forms, independently, in duplicate) and any processes for obtaining and confirming data from investigators.                                                                                                                                  | 6-7                |
| Data items                         | 11 | List and define all variables for which data were sought (e.g., PICOS, funding sources) and any assumptions and simplifications made.                                                                                                                                                                       | 6-7                |
| Risk of bias in individual studies | 12 | Describe methods used for assessing risk of bias of individual studies (including specification of whether this was done at the study or outcome level), and how this information is to be used in any data synthesis.                                                                                      | 7                  |
| Summary measures                   | 13 | State the principal summary measures (e.g., risk ratio, difference in means).                                                                                                                                                                                                                               | 8-9                |
| Synthesis of results               | 14 | Describe the methods of handling data and combining results of studies, if done, including measures of consistency (e.g., $I^2$ for each meta-analysis).                                                                                                                                                    | 8-9                |

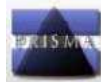

# PRISMA 2009 Checklist

Page 1 of 2

| Section/topic                 | #  | Checklist item                                                                                                                                                                                           | Reported on page # |
|-------------------------------|----|----------------------------------------------------------------------------------------------------------------------------------------------------------------------------------------------------------|--------------------|
| Risk of bias across studies   | 15 | Specify any assessment of risk of bias that may affect the cumulative evidence (e.g., publication bias, selective reporting within studies).                                                             | 8-9                |
| Additional analyses           | 16 | Describe methods of additional analyses (e.g., sensitivity or subgroup analyses, meta-regression), if done, indicating which were pre-specified.                                                         | 8-9                |
| <b>RESULTS</b>                |    |                                                                                                                                                                                                          |                    |
| Study selection               | 17 | Give numbers of studies screened, assessed for eligibility, and included in the review, with reasons for exclusions at each stage, ideally with a flow diagram.                                          | 9                  |
| Study characteristics         | 18 | For each study, present characteristics for which data were extracted (e.g., study size, PICOS, follow-up period) and provide the citations.                                                             | 9-10 and tables    |
| Risk of bias within studies   | 19 | Present data on risk of bias of each study and, if available, any outcome level assessment (see item 12).                                                                                                | 8                  |
| Results of individual studies | 20 | For all outcomes considered (benefits or harms), present, for each study: (a) simple summary data for each intervention group (b) effect estimates and confidence intervals, ideally with a forest plot. | 10-11 and figures  |
| Synthesis of results          | 21 | Present results of each meta-analysis done, including confidence intervals and measures of consistency.                                                                                                  | 10-11 and figures  |
| Risk of bias across studies   | 22 | Present results of any assessment of risk of bias across studies (see Item 15).                                                                                                                          | 8                  |
| Additional analysis           | 23 | Give results of additional analyses, if done (e.g., sensitivity or subgroup analyses, meta-regression [see Item 16]).                                                                                    | 10-11              |
| <b>DISCUSSION</b>             |    |                                                                                                                                                                                                          |                    |
| Summary of evidence           | 24 | Summarize the main findings including the strength of evidence for each main outcome; consider their relevance to key groups (e.g., healthcare providers, users, and policy makers).                     | 11-13              |
| Limitations                   | 25 | Discuss limitations at study and outcome level (e.g., risk of bias), and at review-level (e.g., incomplete retrieval of identified research, reporting bias).                                            | 11-13              |
| Conclusions                   | 26 | Provide a general interpretation of the results in the context of other evidence, and implications for future research.                                                                                  | 11-13              |
| <b>FUNDING</b>                |    |                                                                                                                                                                                                          |                    |
| Funding                       | 27 | Describe sources of funding for the systematic review and other support (e.g., supply of data); role of funders for the systematic review.                                                               | 14                 |



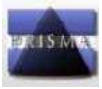

# PRISMA 2009 Checklist

1  
2  
3  
4  
5  
6  
7  
8  
9  
10  
11  
12  
13  
14  
15  
16  
17  
18  
19  
20  
21  
22  
23  
24  
25  
26  
27  
28  
29  
30  
31  
32  
33  
34  
35  
36  
37  
38  
39  
40  
41  
42  
43  
44  
45  
46  
47  
48  
49

doi:10.1371/journal.pmed1000097

For more information, visit: [www.prisma-statement.org](http://www.prisma-statement.org).

Page 2 of 2

For peer review only
